# Supplementary material for: Same ligand, three first-row metals: comparing M-amido bifunctional reactivity (Mn, Fe, Co)
Source: Royal Society of Chemistry journal article supplement (doi:10.1039/d1dt02637b), 2021-01-01
Supplement: d1dt02637b1.pdf [file d1dt02637b1.pdf]

## Same ligand, three first-row metals: Comparing M-amido bifunctional reactivity (Mn, Fe, Co)

Matthew R. Elsby,<sup>†</sup> Scott Y. H. Kim,<sup>†</sup> Stephan N. Steinmann,<sup>\*,‡</sup> and R. Tom Baker<sup>\*,†</sup>

<sup>†</sup> Department of Chemistry and Biomolecular Sciences and Centre for Catalysis Research and Innovation,  
University of Ottawa, Ottawa, Ontario K1N 6N5, Canada

<sup>‡</sup> Univ Lyon, ENS de Lyon, CNRS UMR 5182, Laboratoire de Chimie, Lyon, France

rbaker@uottawa.ca; stephan.steinmann@ens-lyon.fr

### **Electronic Supplementary Information:**

Table of Contents:

|                                                  |     |
|--------------------------------------------------|-----|
| I. General Considerations.....                   | S2  |
| II. Synthesis, Reactivity, and Spectroscopy..... | S2  |
| III. Electrochemistry.....                       | S6  |
| IV. X-ray Diffraction Data.....                  | S9  |
| V. DFT Calculations.....                         | S11 |
| VI. References.....                              | S65 |

## I. General Considerations.

All reactions were carried out under an atmosphere of dry, oxygen-free dinitrogen by standard Schlenk or glovebox techniques. Benzene- $d_6$  ( $C_6D_6$ ) was degassed by three freeze-pump-thaws and further dried by running through a short column of activated alumina. Diethyl ether, THF, and hexanes were dried on columns of activated alumina using a J. C. Meyer solvent purification system and stored over 4 Å molecular sieves.  $^1H$  NMR spectra were recorded on a Bruker Avance Spectrometer operating at 300 MHz with respect to proton nuclei.  $^1H$  NMR spectra were referenced to residual protons ( $C_6D_6$   $\delta$  7.15) with respect to tetramethylsilane. EPR spectra were recorded on a Bruker Elexsys E580 X-band spectrometer. Electron impact mass spectra were recorded on a Kratos Concept Magnetic Sector Mass Spectrometer. Solution state magnetic susceptibility was determined by the Evans method.<sup>1</sup> The compounds **Mn1**<sup>2</sup> and **Fe1**<sup>3</sup> have been previously reported and characterized.  $Co[N(SiMe_3)_2]_2$  was prepared according to literature procedures.<sup>4</sup>

## II. Synthesis, Reactivity, and Spectroscopy

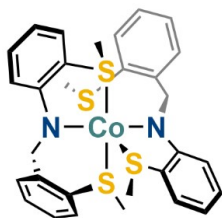

**Synthesis of  $Co(\kappa^3-S^{Me}NS^{Me})_2$  (**Co1**).** Solid  $Co[N(SiMe_3)_2]_2$  (0.120 g, 0.267 mmol) and HL (0.150g, 0.533 mmol, 2 equiv.) were charged to a 20 mL scintillation vial equipped with a stir bar. The vial was charged with 5 mL of diethyl ether and the purple solution was stirred for 6 h, resulting in the formation of a precipitate. The solution was filtered through a glass frit

and the resulting purple solid was washed with diethyl ether (3 x 2 mL), and dried under reduced pressure to yield 0.160 g of **Co1** (92% yield). Crystals suitable for single crystal X-ray diffraction were grown from a concentrated THF solution layered with hexanes at  $-35$  °C.  $^1H$  NMR ( $C_6D_6$ , 23 °C, 300 MHz):  $\delta$  -47.81 (br s, 1H); -16.20 (br s, 1H); -1.58 (br s, 1H); 14.23 (br s, 1H); 41.16 (br s, 1H); 46.68 (br s, 3H, S- $CH_3$ ); 63.71 (br s, 1H); 111.77 (br s, 3H, S- $CH_3$ ). Magnetic susceptibility (Evans method in benzene- $d_6$ , 23 °C):  $\mu_{eff} = 3.9 \mu_B$ . HRMS (EI-QTOF): calcd for  $C_{30}H_{32}CoN_2S_4$  m/z 607.07803. Found m/z 607.07634.

**Reactions with Hydrogen.** The metal complex (**Mn1**, **Fe1**, or **Co1**) (0.008 mg, 0.013 mmol) was dissolved in 0.6 g of THF and added to a J. Young tube. The nitrogen atmosphere was evacuated and 1 atm of  $H_2$  was added through a gas inlet in the glovebox. The solution was monitored for color change and by  $^1H$  NMR.

**Mn1** - changed color from yellow to light brown. EPR shows new signal (Figure S2)

**Fe1** - no color change.  $^1\text{H}$  NMR showed no change (Figure S4).

**Co1** - no color change.  $^1\text{H}$  NMR showed no change (Figure S5).

Complexes Fe1 and Co1 were then heated under  $\text{H}_2$  at  $60^\circ\text{C}$ , resulting in formation of black precipitates.

**Hydrogenation of benzaldehyde.** A solution of **Mn1** (0.011 mg, 0.018 mmol) and benzaldehyde (0.01 g, 0.096 mmol) in 0.6 g of  $\text{C}_6\text{D}_6$  was added to a J. Young tube. The nitrogen atmosphere was evacuated and 1 atm of  $\text{H}_2$  was added through a gas inlet in the glovebox. The solution was monitored for color change and by  $^1\text{H}$  NMR (Figure S5).

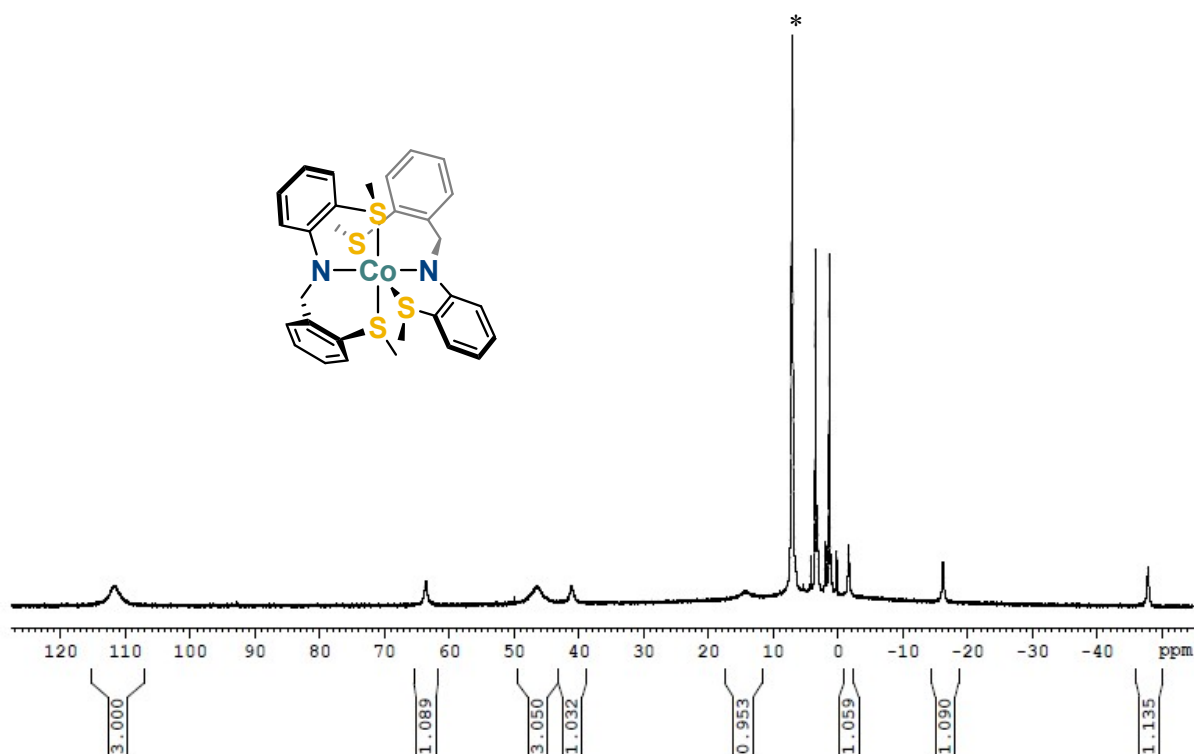

**Figure S1.**  $^1\text{H}$  NMR spectrum of  $\text{Co}(\kappa^3\text{-S}^{\text{Me}}\text{NS}^{\text{Me}})_2$  (**Co1**). \* is  $\text{C}_6\text{D}_6$ .

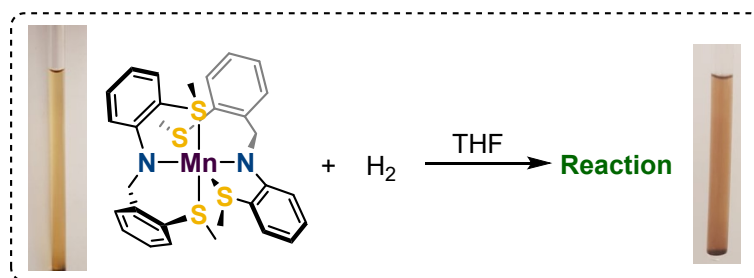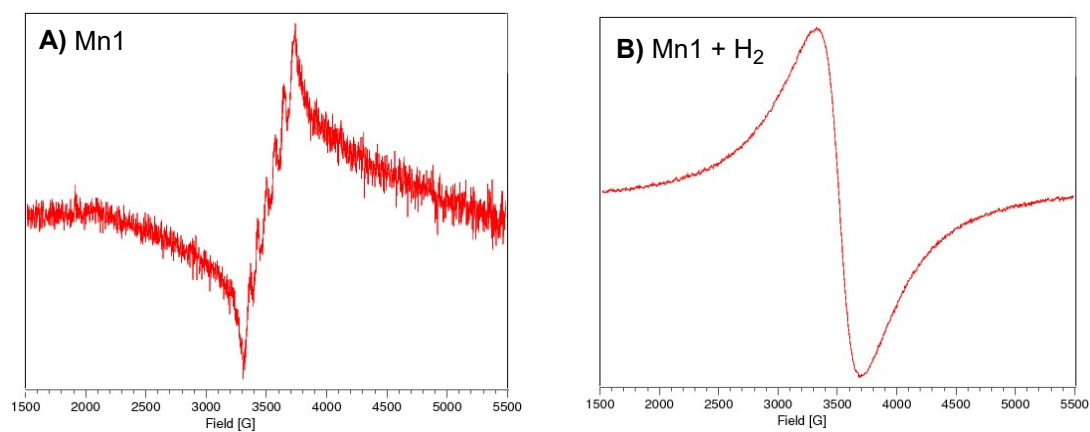

**Figure S2.** EPR spectra of: A) Mn1, and B) Mn1 + H<sub>2</sub>.

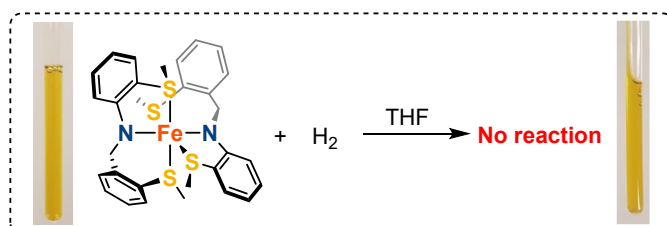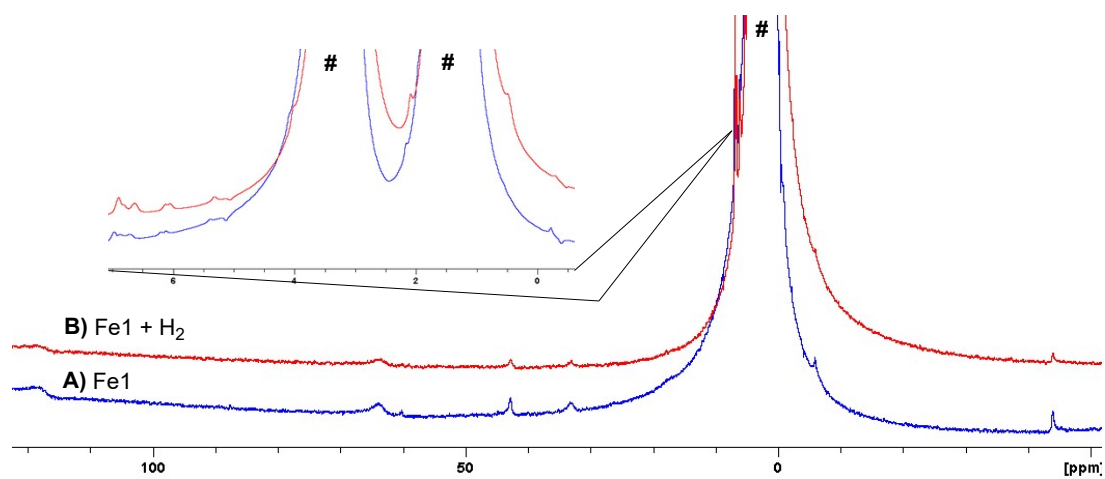

**Figure S3.** Stacked plot of <sup>1</sup>H NMR spectra: A) Fe1, and B) Fe1 + H<sub>2</sub>. # is THF.

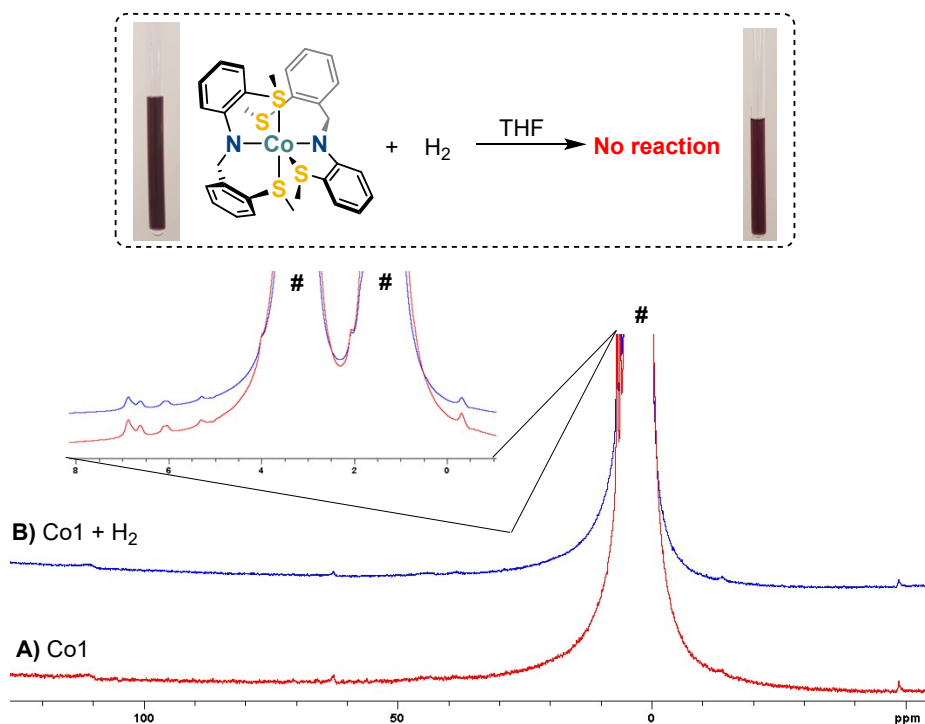

**Figure S4.** Stacked plot of  $^1\text{H}$  NMR spectra: A) **Co1**, and B) **Co1** +  $\text{H}_2$ . # is THF.

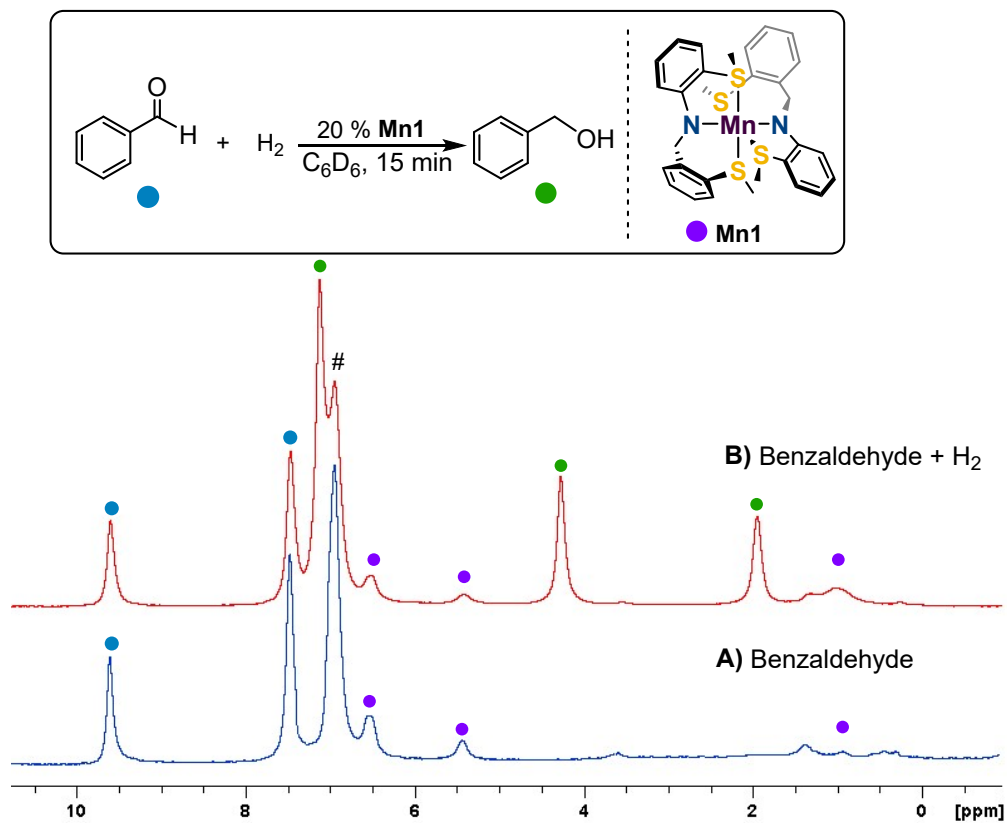

**Figure S5.** Stacked plot of  $^1\text{H}$  NMR spectra showing reaction of benzaldehyde and  $\text{H}_2$  with 20% loading of **Mn1**.

### III. Electrochemistry

*Cyclic voltammetry* (CV) data were obtained using a VeraSTAT 3 potentiostat, and performed under a nitrogen atmosphere in a sealed one-compartment, three electrode electrochemical cell (Pt working, Pt counter, Ag wire pseudoreference). Tetrabutylammonium hexafluorophosphate in anhydrous DCM was used as supporting electrolyte (0.1 M). All potentials are referenced to internal standard redox potential of Fc/Fc<sup>+</sup> (Fc = ferrocene). An automatic ohmic drop compensation procedure was systematically implemented prior to recording CV data. All the electrodes were purchased from EDAQ. Platinum ( $\varnothing = 1$  mm) working electrode was polished with 50 micron alumina paste before each recording.

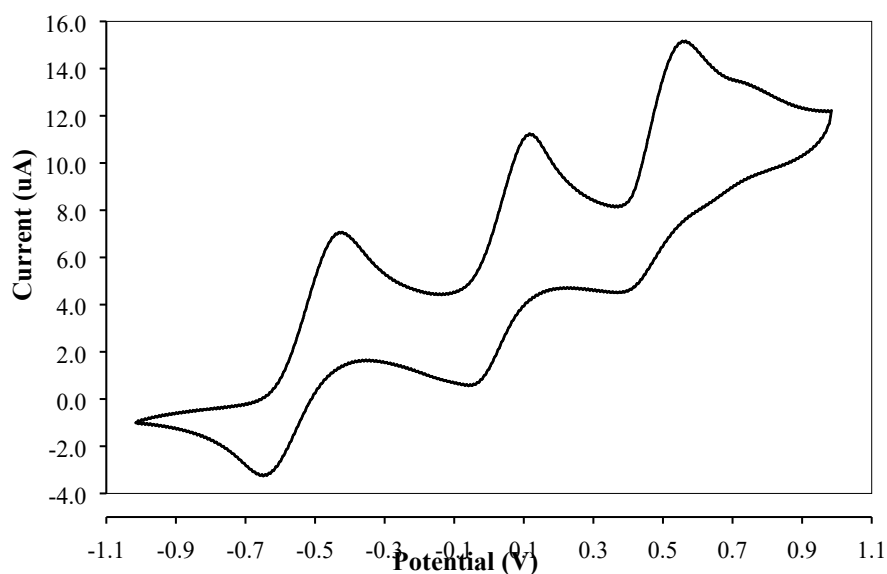

**Figure S6.** Cyclic voltammogram of **Fe1** referenced to internal standard Fc/Fc<sup>+</sup>. Conditions: scan rate, 100 mV/s, electrolyte, 0.1 M [nBu<sub>4</sub>N][PF<sub>6</sub>] in DCM, under N<sub>2</sub>.

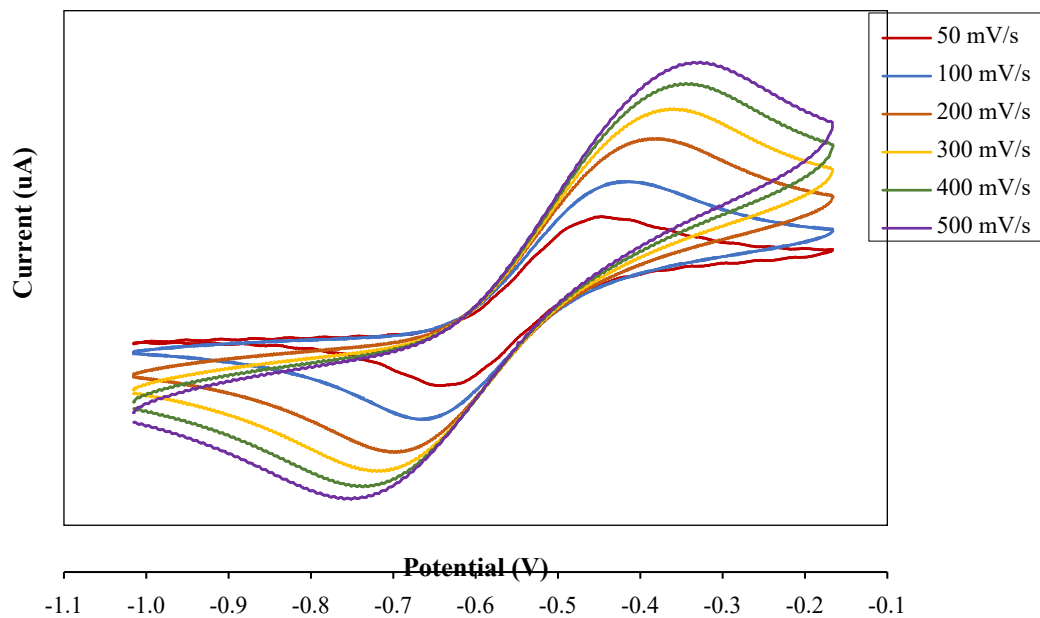

**Figure S7.** Cyclic voltammograms of **Fe1** recorded at various scan rates (50-500 mV/s) referenced to internal standard Fc/Fc<sup>+</sup>. Conditions: scan rate, 100 mV/s, electrolyte, 0.1 M [nBu<sub>4</sub>N][PF<sub>6</sub>] in DCM, under N<sub>2</sub>.

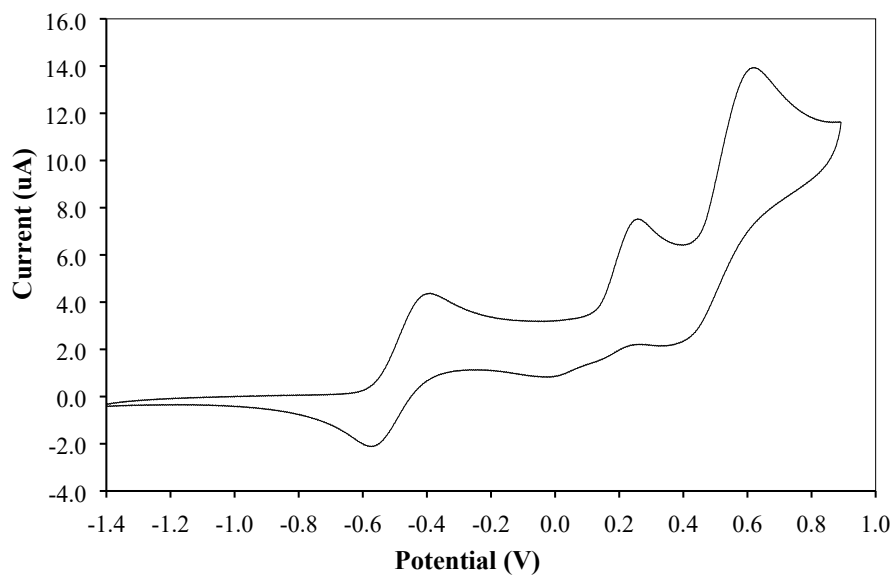

**Figure S8.** Cyclic voltammogram of **Co1** referenced to internal standard Fc/Fc<sup>+</sup>. Conditions: scan rate, 100 mV/s, electrolyte, 0.1 M [nBu<sub>4</sub>N][PF<sub>6</sub>] in DCM, under N<sub>2</sub>.

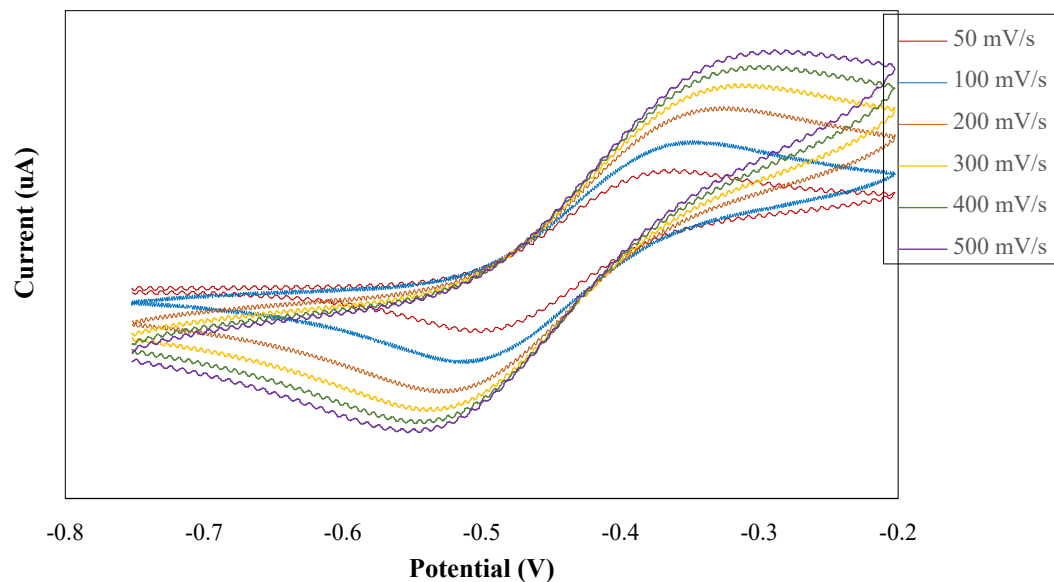

**Figure S9.** Cyclic voltammograms of **Co1** recorded at various scan rates (50-500 mV/s) referenced to internal standard Fc/Fc<sup>+</sup>. Conditions: scan rate, 100 mV/s, electrolyte, 0.1 M [nBu<sub>4</sub>N][PF<sub>6</sub>] in DCM, under N<sub>2</sub>.

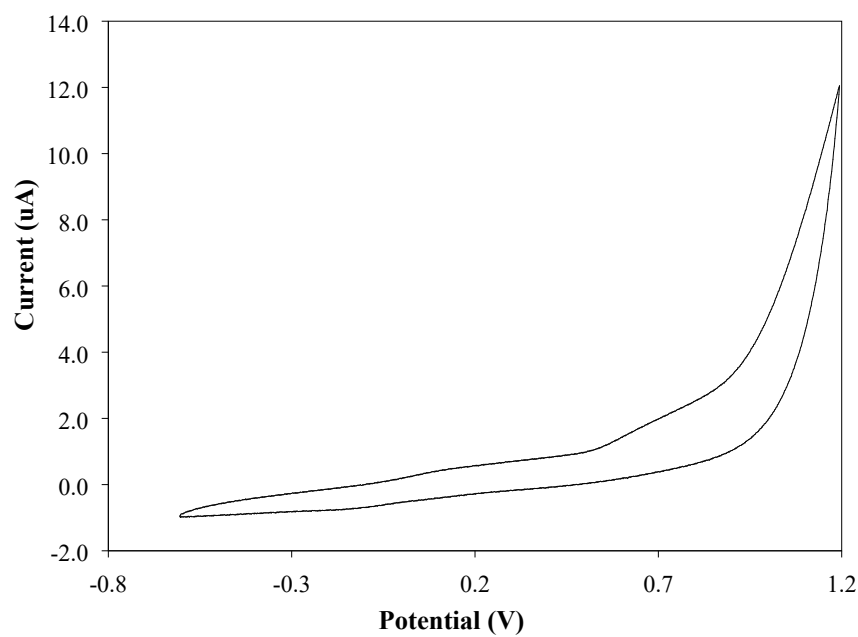

**Figure S10.** Cyclic voltammogram of **Mn11** referenced to internal standard Fc/Fc<sup>+</sup>. Conditions: scan rate, 100 mV/s, electrolyte, 0.1 M [nBu<sub>4</sub>N][PF<sub>6</sub>] in DCM, under N<sub>2</sub>.



#### **IV. Crystallographic Details**

The crystals were mounted on thin glass fibers using paraffin oil. The crystals of **Co1** were cooled to  $200 \pm 2$  K during data collection. The data were collected on a Bruker single-crystal diffractometer equipped with a sealed Mo tube source (wavelength 0.71073 Å) and APEX II CCD detector. The raw data collection and processing were performed with Bruker APEX II software package.<sup>5</sup> Semi-empirical absorption correction based on equivalent reflections was applied.<sup>6</sup> Systematic absences and unit cell parameters were consistent with monoclinic  $P2_1/n$  (#14) for **Co1**. The structure was solved by intrinsic phasing and refined with a full-matrix least-squares procedure based on  $F^2$ , using SHELXL.<sup>7</sup> All non-hydrogen atoms were refined anisotropically. The hydrogen atoms bonded to carbon atoms were placed in idealized positions.

#### **Refinement details for $\text{Co}(\kappa^3\text{-S}^{\text{Me}}\text{NS}^{\text{Me}})_2$ (**Co1**).**

The structure was refined without additional restraints / constraints. No disorder was present.

**Table S1.** Crystal data and structure refinement for  $\text{Co}(\kappa^3\text{-S}^{\text{Me}}\text{NS}^{\text{Me}})_2$  (**Co1**).

|                                                |                                                              |
|------------------------------------------------|--------------------------------------------------------------|
| Empirical formula                              | $\text{C}_{30}\text{H}_{32}\text{CoN}_2\text{S}_4$           |
| Formula weight                                 | 607.74                                                       |
| Temperature/K                                  | 200(2)                                                       |
| Crystal system                                 | Monoclinic                                                   |
| Space group                                    | $P2_1/n$                                                     |
| $a/\text{Å}$                                   | 14.3526(5)                                                   |
| $b/\text{Å}$                                   | 10.3708(4)                                                   |
| $c/\text{Å}$                                   | 19.8110(6)                                                   |
| $\alpha/^\circ$                                | 90                                                           |
| $\beta/^\circ$                                 | 107.760(2)                                                   |
| $\gamma/^\circ$                                | 90                                                           |
| Volume/ $\text{Å}^3$                           | 2808.29(17)                                                  |
| Z                                              | 4                                                            |
| $\rho_{\text{calc}}/\text{cm}^3$               | 1.437                                                        |
| $\mu/\text{mm}^{-1}$                           | 0.932                                                        |
| F(000)                                         | 1268.0                                                       |
| Crystal size/ $\text{mm}^3$                    | $0.542 \times 0.211 \times 0.064$                            |
| Radiation                                      | MoK $\alpha$ ( $\lambda = 0.71073$ )                         |
| 2 $\Theta$ range for data collection/ $^\circ$ | 4.482 to 56.758                                              |
| Index ranges                                   | $-19 \leq h \leq 19, -13 \leq k \leq 13, -26 \leq l \leq 21$ |
| Reflections collected                          | 27717                                                        |
| Independent reflections                        | 7003 [ $R_{\text{int}} = 0.0516, R_{\text{sigma}} =$         |

|                                             |                                                   |
|---------------------------------------------|---------------------------------------------------|
|                                             | 0.0523]                                           |
| Data/restraints/parameters                  | 7003/0/338                                        |
| Goodness-of-fit on F <sup>2</sup>           | 1.012                                             |
| Final R indexes [ $I \geq 2\sigma(I)$ ]     | R <sub>1</sub> = 0.0424, wR <sub>2</sub> = 0.0920 |
| Final R indexes [all data]                  | R <sub>1</sub> = 0.0783, wR <sub>2</sub> = 0.1076 |
| Largest diff. peak/hole / e Å <sup>-3</sup> | 0.36/-0.32                                        |

**Table S2.** Bond lengths for Co( $\kappa^3$ -S<sup>Me</sup>NS<sup>Me</sup>)<sub>2</sub> (Co1).

| Atom | Atom | Length/Å  | Atom | Atom | Length/Å |
|------|------|-----------|------|------|----------|
| Co1  | N9   | 1.967(2)  | C15  | C16  | 1.390(4) |
| Co1  | N29  | 1.974(2)  | C16  | S17  | 1.767(3) |
| Co1  | S2   | 2.4723(7) | S17  | C18  | 1.795(3) |
| Co1  | S22  | 2.4780(7) | C21  | S22  | 1.801(3) |
| Co1  | S17  | 2.6481(7) | S22  | C23  | 1.782(3) |
| Co1  | S37  | 2.7027(7) | C23  | C24  | 1.376(4) |
| C1   | S2   | 1.795(3)  | C23  | C28  | 1.424(4) |
| S2   | C3   | 1.772(3)  | C24  | C25  | 1.358(4) |
| C3   | C4   | 1.376(3)  | C25  | C26  | 1.386(5) |
| C3   | C8   | 1.424(3)  | C26  | C27  | 1.364(4) |
| C4   | C5   | 1.373(4)  | C27  | C28  | 1.415(4) |
| C5   | C6   | 1.390(4)  | C28  | N29  | 1.363(3) |
| C6   | C7   | 1.374(4)  | N29  | C30  | 1.463(3) |
| C7   | C8   | 1.409(3)  | C30  | C31  | 1.517(3) |
| C8   | N9   | 1.363(3)  | C31  | C36  | 1.391(3) |
| N9   | C10  | 1.472(3)  | C31  | C32  | 1.394(3) |
| C10  | C11  | 1.511(4)  | C32  | C33  | 1.380(4) |
| C11  | C12  | 1.386(4)  | C33  | C34  | 1.374(4) |
| C11  | C16  | 1.400(4)  | C34  | C35  | 1.387(4) |
| C12  | C13  | 1.386(4)  | C35  | C36  | 1.389(3) |
| C13  | C14  | 1.375(5)  | C36  | S37  | 1.772(3) |
| C14  | C15  | 1.378(5)  | S37  | C38  | 1.789(3) |

## V. DFT Calculations

**Computational Details.** All calculations were carried out using DFT at the M06L level of theory using the Gaussian 09 package<sup>8</sup> on the WebMO platform.<sup>9</sup> Geometry optimizations and vibrational frequency calculations were carried out using the def2-SVP basis set. The energies of optimized structures were reevaluated by additional single-point energy calculations on each optimized geometry using the def2-TZVP basis set. Additional functionals (PBE-D3, PBE0-D3, B3LYP-D3, TPSS-D3, wB97XD) were evaluated using the def2-TZVP basis set to benchmark the M06L method. Solvation energies were evaluated by a self-consistent reaction field (SCRF) approach.<sup>10-12</sup> Fukui indices were calculated using the Hirshfeld charges from single point energy calculations.<sup>13</sup>

The energy components have been computed with the following protocol. The free energy in solution-phase,  $G_{(sol)}$ , has been calculated as follows, with  $T = 298$  K to match the experimental room temperature conditions:

$$G_{(sol)} = G_{(gas)} + G_{solv}$$

$$G_{(gas)} = H_{(gas)} - TS_{(gas)}$$

$$H_{(gas)} = E_{(SCF)} + ZPE$$

$$\Delta E_{(SCF)} = \sum E_{(SCF)} \text{ for products} - \sum E_{(SCF)} \text{ for reactants}$$

$$\Delta G_{(sol)} = \sum G_{(sol)} \text{ for products} - \sum G_{(sol)} \text{ for reactants}$$

Fukui indices were calculated from the Hirshfeld charges using the following formulae:

Electrophilicity of atom A in molecule M (of N electrons)

$$f_A^+ = P_A(N+1) - P_A(N)$$

Nucleophilicity of atom A in molecule M (of N electrons)

$$f_A^- = P_A(N) - P_A(N-1)$$

**Table S3.** Comparison of energies for ground state determination for **Mn1**, **Fe1**, and **Co1**.

|                                       |     | Mn1 | Fe1  | Co1 |
|---------------------------------------|-----|-----|------|-----|
| energy (kcal/mol)<br>of spin state, I | 1/2 | 5.8 |      |     |
|                                       | 5/2 | 0   |      |     |
|                                       | 1   |     | 13.2 |     |
|                                       | 3   |     | 0    |     |
|                                       | 1/2 |     |      | 3.6 |
|                                       | 3/2 |     |      | 0   |

**Table S4.** Comparison of key bond lengths (Å) of **Mn1** to DFT optimized structures for ground state determination.

| Complex                                            | Spin | Bond   | Length (Å) |       |
|----------------------------------------------------|------|--------|------------|-------|
|                                                    |      |        | DFT        | Xray  |
| Mn(S <sup>Me</sup> NS <sup>Me</sup> ) <sub>2</sub> | 6    | Mn1-N1 | 2.118      | 2.099 |
|                                                    |      | Mn1-N2 | 2.105      | 2.112 |
|                                                    |      | Mn1-S1 | 2.655      | 2.624 |
|                                                    |      | Mn1-S2 | 2.755      | 2.734 |
|                                                    |      | Mn1-S3 | 2.657      | 2.647 |
|                                                    |      | Mn1-S4 | 2.772      | 2.682 |
|                                                    | 2    | Mn1-N1 | 2.055      | 2.099 |
|                                                    |      | Mn1-N2 | 2.004      | 2.112 |
|                                                    |      | Mn1-S1 | 2.305      | 2.624 |
|                                                    |      | Mn1-S2 | 2.430      | 2.734 |
|                                                    |      | Mn1-S3 | 2.375      | 2.647 |
|                                                    |      | Mn1-S4 | 2.334      | 2.682 |

**Table S5.** Comparison of key bond lengths (Å) of **Fe1** to DFT optimized structures for ground state determination.

| Complex                                            | Spin | Bond   | Length (Å) |        |
|----------------------------------------------------|------|--------|------------|--------|
|                                                    |      |        | DFT        | Xray   |
| Fe(S <sup>Me</sup> NS <sup>Me</sup> ) <sub>2</sub> | 5    | Fe1-N1 | 2.011      | 2.015  |
|                                                    |      | Fe1-N2 | 1.965      | 2.031  |
|                                                    |      | Fe1-S1 | 2.582      | 2.5389 |
|                                                    |      | Fe1-S2 | 2.793      | 2.7156 |
|                                                    |      | Fe1-S3 | 2.534      | 2.5431 |
|                                                    |      | Fe1-S4 | 2.782      | 2.7014 |
|                                                    | 3    | Fe1-N1 | 2.050      | 2.015  |
|                                                    |      | Fe1-N2 | 2.035      | 2.031  |
|                                                    |      | Fe1-S1 | 2.534      | 2.5389 |
|                                                    |      | Fe1-S2 | 2.782      | 2.7156 |
|                                                    |      | Fe1-S3 | 2.582      | 2.5431 |
|                                                    |      | Fe1-S4 | 2.793      | 2.7014 |

**Table S6.** Comparison of key bond lengths (Å) of **Co1** to DFT optimized structures for ground state determination.

| Complex                                            | Spin | Bond   | Length (Å) |        |
|----------------------------------------------------|------|--------|------------|--------|
|                                                    |      |        | DFT        | Xray   |
| Co(S <sup>Me</sup> NS <sup>Me</sup> ) <sub>2</sub> | 2    | Co1-N1 | 1.954      | 1.967  |
|                                                    |      | Co1-N2 | 1.954      | 1.974  |
|                                                    |      | Co1-S1 | 2.421      | 2.4723 |
|                                                    |      | Co1-S2 | 2.598      | 2.6481 |
|                                                    |      | Co1-S3 | 2.42       | 2.478  |
|                                                    |      | Co1-S4 | 2.598      | 2.7027 |
|                                                    | 4    | Co1-N1 | 1.989      | 1.967  |
|                                                    |      | Co1-N2 | 1.989      | 1.974  |
|                                                    |      | Co1-S1 | 2.516      | 2.4723 |
|                                                    |      | Co1-S2 | 2.747      | 2.6481 |
|                                                    |      | Co1-S3 | 2.516      | 2.478  |
|                                                    |      | Co1-S4 | 2.747      | 2.7027 |

**Table S7.** Energies (eV) of alpha and beta frontier orbitals in neutral, cationic, and anionic analogues of **Mn1**.

| Mn1                   |       |      |          |          |          |          |          |
|-----------------------|-------|------|----------|----------|----------|----------|----------|
| Multiplicity = 6      |       |      |          |          |          |          |          |
| Neutral               | Alpha | HOMO | -0.20577 | -0.1829  | -0.16034 | -0.151   | -0.14721 |
|                       |       | LUMO | -0.04733 | -0.04694 | -0.04126 | -0.03942 | -0.03871 |
|                       | Beta  | HOMO | -0.21349 | -0.2105  | -0.20457 | -0.16441 | -0.15348 |
|                       |       | LUMO | -0.05868 | -0.05299 | -0.04973 | -0.04504 | -0.04198 |
| Multiplicity = 5 or 7 |       |      |          |          |          |          |          |
| +1 complex            | Alpha | HOMO | -0.23464 | -0.2159  | -0.1991  | -0.18552 |          |
|                       |       | LUMO | -0.1828  | -0.06851 | -0.06627 | -0.06532 | -0.06317 |
|                       | Beta  | HOMO | -0.24433 | -0.23521 | -0.23222 | -0.21048 | -0.20156 |
|                       |       | LUMO | -0.10616 | -0.1016  | -0.10021 | -0.08481 | -0.07225 |
| Multiplicity = 5      |       |      |          |          |          |          |          |
| -1 complex            | Alpha | HOMO | -0.16849 | -0.13606 | -0.1259  | -0.12108 | -0.09983 |
|                       |       | LUMO | -0.01715 | -0.0162  | -0.01257 | -0.01123 | -0.00981 |
|                       | Beta  | HOMO | -0.02954 |          |          |          |          |
|                       |       | LUMO | -0.02304 | -0.01951 | -0.01726 | -0.01424 | -0.01071 |

**Table S8.** Energies (eV) of alpha and beta frontier orbitals in neutral, cationic, and anionic analogues of **Fe1**.

|                   |              | <b>Fe1</b>              |          |          |          |          |          |
|-------------------|--------------|-------------------------|----------|----------|----------|----------|----------|
|                   |              | <b>Multiplicity = 5</b> |          |          |          |          |          |
| <b>Neutral</b>    | <b>Alpha</b> | <b>HOMO</b>             | -0.20411 | -0.18387 | -0.16242 | -0.16111 | -0.15603 |
|                   |              | <b>LUMO</b>             | -0.04478 | -0.04332 | -0.04167 | -0.03922 | -0.03609 |
|                   | <b>Beta</b>  | <b>HOMO</b>             | -0.12639 |          |          |          |          |
|                   |              | <b>LUMO</b>             | -0.08413 | -0.07934 | -0.0497  | -0.04466 | -0.0424  |
|                   |              | <b>Multiplicity = 6</b> |          |          |          |          |          |
| <b>+1 complex</b> | <b>Alpha</b> | <b>HOMO</b>             | -0.24194 | -0.22649 | -0.21467 | -0.20253 | -0.20035 |
|                   |              | <b>LUMO</b>             | -0.07327 | -0.07    | -0.06733 | -0.06468 | -0.06039 |
|                   | <b>Beta</b>  | <b>HOMO</b>             | -0.24727 | -0.23642 | -0.2322  | -0.2137  | -0.19057 |
|                   |              | <b>LUMO</b>             | -0.19375 | -0.16315 | -0.15288 | -0.14785 | -0.10282 |
|                   |              | <b>Multiplicity = 4</b> |          |          |          |          |          |
| <b>-1 complex</b> | <b>Alpha</b> | <b>HOMO</b>             | -0.13304 | -0.12323 | -0.11729 | -0.10753 | -0.08604 |
|                   |              | <b>LUMO</b>             | -0.01949 | -0.01906 | -0.01395 | -0.01277 | -0.00916 |
|                   | <b>Beta</b>  | <b>HOMO</b>             | -0.0465  | -0.034   |          |          |          |
|                   |              | <b>LUMO</b>             | -0.02121 | -0.02016 | -0.01575 | -0.01402 | -0.00898 |

**Table S9.** Energies (eV) of alpha and beta frontier orbitals in neutral, cationic, and anionic analogues of **Co1**.

|                   |              | <b>Co1</b>              |          |          |          |          |          |
|-------------------|--------------|-------------------------|----------|----------|----------|----------|----------|
|                   |              | <b>Multiplicity = 4</b> |          |          |          |          |          |
| <b>Neutral</b>    | <b>Alpha</b> | <b>HOMO</b>             | -0.20666 | -0.18269 | -0.16685 | -0.15915 | -0.15476 |
|                   |              | <b>LUMO</b>             | -0.04469 | -0.04463 | -0.04252 | -0.03872 | -0.03819 |
|                   | <b>Beta</b>  | <b>HOMO</b>             | -0.16016 | -0.14566 |          |          |          |
|                   |              | <b>LUMO</b>             | -0.10652 | -0.06207 | -0.04811 | -0.04291 | -0.04238 |
|                   |              | <b>Multiplicity = 5</b> |          |          |          |          |          |
| <b>+1 complex</b> | <b>Alpha</b> | <b>HOMO</b>             | -0.2357  | -0.21627 | -0.21582 | -0.20831 | -0.20221 |
|                   |              | <b>LUMO</b>             | -0.07619 | -0.07607 | -0.06564 | -0.06168 | -0.06098 |
|                   | <b>Beta</b>  | <b>HOMO</b>             | -0.19821 |          |          |          |          |
|                   |              | <b>LUMO</b>             | -0.18471 | -0.15567 | -0.10996 | -0.09717 | -0.07202 |
|                   |              | <b>Multiplicity = 3</b> |          |          |          |          |          |
| <b>-1 complex</b> | <b>Alpha</b> | <b>HOMO</b>             | -0.12333 | -0.11385 | -0.11202 | -0.09075 | -0.07146 |
|                   |              | <b>LUMO</b>             | -0.02063 | -0.01919 | -0.01723 | -0.01545 | -0.01128 |
|                   | <b>Beta</b>  | <b>HOMO</b>             | -0.07167 | -0.06168 | -0.04787 |          |          |
|                   |              | <b>LUMO</b>             | -0.02075 | -0.01986 | -0.01775 | -0.01623 | -0.01056 |

**Table S10.** Calculated atomic Hirshfeld charges for **Mn1**, **Mn1<sup>+</sup>**, and **Mn1<sup>-</sup>**.

| Atom     | Hirshfeld Charges |           |           |
|----------|-------------------|-----------|-----------|
|          | Mn1               | Mn1(+)    | Mn1(-)    |
| Mn       | 0.2304            | 0.282353  | 0.120311  |
| N        | -0.195624         | -0.157384 | -0.193764 |
| N        | -0.199251         | -0.132784 | -0.19668  |
| S(5)     | -0.047066         | -0.014378 | -0.069367 |
| S(6)     | -0.026408         | -0.017341 | -0.04849  |
| S(5)     | -0.053318         | -0.012756 | -0.096702 |
| S(6)     | -0.015684         | 0.004407  | -0.057904 |
| C5(5)-N  | 0.042347          | 0.058726  | 0.040025  |
| C6(5)-S  | -0.033822         | -0.005598 | -0.036593 |
| C12(5)   | -0.009868         | 0.026604  | -0.025512 |
| C13(5)   | -0.050239         | 0.029858  | -0.071582 |
| C14(5)   | -0.023589         | 0.021344  | -0.042151 |
| C15(5)   | -0.054436         | 0.001312  | -0.067864 |
| C20-N    | 0.045082          | 0.085794  | 0.028215  |
| C21(6)-C | 0.006259          | 0.006364  | -0.002463 |
| C22(6)-S | -0.004044         | -0.002646 | -0.017405 |
| C28(6)   | 0.008192          | 0.020207  | -0.019809 |
| C29(6)   | 0.008767          | 0.027211  | -0.018427 |
| C30(6)   | 0.002             | 0.018429  | -0.042207 |
| C31(6)   | 0.006646          | 0.018905  | -0.021004 |
| C38(5)-N | 0.050092          | 0.057669  | 0.044496  |
| C39(5)-S | -0.033544         | -0.019681 | -0.040251 |
| C45(5)   | 0.003664          | 0.032761  | -0.026216 |
| C46(5)   | -0.0456           | 0.011001  | -0.074601 |
| C47(5)   | -0.009035         | 0.024292  | -0.045908 |
| C48(5)   | -0.043501         | -0.000424 | -0.068489 |
| C1-N     | 0.041668          | 0.077249  | 0.016027  |
| C53(6)-C | 0.009821          | 0.009922  | -0.00178  |
| C54(6)-S | -0.002184         | -0.002129 | -0.026624 |
| C60(6)   | 0.015743          | 0.026218  | -0.033274 |
| C61(6)   | 0.016014          | 0.030501  | -0.021144 |
| C62(6)   | 0.007234          | 0.022884  | -0.056127 |
| C63(6)   | 0.01438           | 0.02501   | -0.034633 |

**Table S11.** Calculated atomic Hirshfeld charges for **Fe1**, **Fe1<sup>+</sup>**, and **Fe1<sup>-</sup>**.

| Atom | Hirshfeld Charges |           |           |
|------|-------------------|-----------|-----------|
|      | Fe1               | Fe1(+)    | Fe1(-)    |
| Mn   | 0.245654          | 0.37401   | 0.082033  |
| N    | -0.184164         | -0.147897 | -0.18633  |
| N    | -0.179387         | -0.149218 | -0.179683 |

|          |           |           |           |
|----------|-----------|-----------|-----------|
| S(5)     | -0.040155 | 0.012199  | -0.082524 |
| S(6)     | -0.038665 | -0.01593  | -0.062657 |
| S(5)     | -0.052738 | -0.009079 | -0.090355 |
| S(6)     | -0.030729 | -0.011465 | -0.044517 |
| C5(5)-N  | 0.046925  | 0.052562  | 0.039333  |
| C6(5)-S  | -0.033425 | -0.021428 | -0.04025  |
| C12(5)   | -0.039995 | -0.00457  | -0.065815 |
| C13(5)   | -0.013049 | 0.020441  | -0.042371 |
| C14(5)   | -0.042474 | 0.006768  | -0.080468 |
| C15(5)   | -0.001104 | 0.026281  | -0.025761 |
| C20-N    | 0.041001  | 0.080022  | 0.008984  |
| C21(6)-C | 0.002029  | 0.003059  | -0.001791 |
| C22(6)-S | -0.006521 | -0.008816 | -0.009228 |
| C28(6)   | 0.007832  | 0.025039  | -0.019509 |
| C29(6)   | -0.002972 | 0.021933  | -0.036068 |
| C30(6)   | 0.008449  | 0.028671  | -0.017075 |
| C31(6)   | 0.005684  | 0.019149  | -0.015732 |
| C38(5)-N | 0.053053  | 0.080799  | 0.025333  |
| C39(5)-S | 0.005331  | 0.006541  | 0.001377  |
| C45(5)   | -0.003796 | -0.004046 | -0.008113 |
| C46(5)   | 0.008811  | 0.023019  | -0.007529 |
| C47(5)   | 0.009949  | 0.029013  | -0.014782 |
| C48(5)   | 0.000996  | 0.021963  | -0.068489 |
| C1-N     | 0.006261  | 0.02022   | 0.016027  |
| C53(6)-C | 0.051341  | 0.055457  | -0.00178  |
| C54(6)-S | -0.035837 | -0.027575 | -0.026624 |
| C60(6)   | 0.001715  | 0.02827   | -0.033274 |
| C61(6)   | -0.04462  | 0.002419  | -0.021144 |
| C62(6)   | -0.008823 | 0.023479  | -0.056127 |
| C63(6)   | -0.046452 | -0.014751 | -0.034633 |

**Table S12.** Calculated atomic Hirshfeld charges for **Co1**, **Co 1<sup>+</sup>**, and **Co 1<sup>-</sup>**.

| Atom    | Hirshfeld Charges |           |           |
|---------|-------------------|-----------|-----------|
|         | Co1               | Co1(+)    | Co1(-)    |
| Mn      | 0.15347           | 0.19826   | -0.014792 |
| N       | -0.157323         | -0.098661 | -0.166624 |
| N       | -0.15734          | -0.098654 | -0.166625 |
| S(5)    | -0.042628         | -0.008568 | -0.087835 |
| S(6)    | -0.029807         | -0.01725  | -0.041966 |
| S(5)    | -0.042603         | -0.008531 | -0.087838 |
| S(6)    | -0.029817         | -0.017262 | -0.041965 |
| C5(5)-N | 0.053481          | 0.09302   | 0.023844  |
| C6(5)-S | 0.005229          | 0.005734  | 0.005165  |
| C12(5)  | -0.004052         | -0.002945 | -0.004972 |



|          |           |           |           |
|----------|-----------|-----------|-----------|
| C13(5)   | 0.003091  | 0.016797  | -0.011881 |
| C14(5)   | -0.003202 | 0.016247  | -0.025013 |
| C15(5)   | 0.005593  | 0.025011  | -0.014894 |
| C20-N    | 0.003421  | 0.015798  | -0.010088 |
| C21(6)-C | 0.052399  | 0.061969  | 0.040049  |
| C22(6)-S | -0.032568 | -0.012749 | -0.044242 |
| C28(6)   | -0.032568 | 0.003579  | -0.070379 |
| C29(6)   | -0.042628 | 0.032124  | -0.043058 |
| C30(6)   | -0.038155 | 0.027541  | -0.090012 |
| C31(6)   | 0.005     | 0.039814  | -0.026087 |
| C38(5)-N | 0.053469  | 0.093016  | 0.023842  |
| C39(5)-S | 0.005226  | 0.005732  | 0.004164  |
| C45(5)   | -0.004053 | -0.002945 | -0.004971 |
| C46(5)   | 0.003414  | 0.015792  | -0.010092 |
| C47(5)   | 0.005588  | 0.02501   | -0.014892 |
| C48(5)   | -0.003209 | 0.016241  | -0.025014 |
| C1-N     | 0.003086  | 0.016793  | -0.01183  |
| C53(6)-C | 0.052395  | 0.061969  | 0.040054  |
| C54(6)-S | -0.032576 | -0.01275  | -0.044239 |
| C60(6)   | 0.004997  | 0.039821  | -0.026088 |
| C61(6)   | -0.038168 | 0.027548  | -0.090006 |
| C62(6)   | -0.005396 | 0.032128  | -0.043057 |
| C63(6)   | -0.040286 | 0.003581  | -0.070384 |

**Table S13.** Calculated Fukui indices for main atoms in **Mn1**.

| Atom        | Fukui(+) | Fukui(-) |
|-------------|----------|----------|
| <b>Mn</b>   | 0.051953 | 0.110089 |
| <b>N</b>    | 0.03824  | -0.00186 |
| <b>N</b>    | 0.066467 | -0.00257 |
| <b>S(5)</b> | 0.032688 | 0.022301 |
| <b>S(6)</b> | 0.009067 | 0.022082 |
| <b>S(5)</b> | 0.040562 | 0.043384 |
| <b>S(6)</b> | 0.020091 | 0.04222  |

**Table S14.** Calculated Fukui indices for main atoms in **Fe1**.

| Atom        | Fukui(+) | Fukui(-) |
|-------------|----------|----------|
| <b>Fe</b>   | 0.128356 | 0.163621 |
| <b>N</b>    | 0.036267 | 0.002166 |
| <b>N</b>    | 0.030169 | 0.000296 |
| <b>S(5)</b> | 0.052354 | 0.042369 |
| <b>S(6)</b> | 0.022735 | 0.023992 |
| <b>S(5)</b> | 0.043659 | 0.037617 |
| <b>S(6)</b> | 0.019264 | 0.013788 |

**Table S15.** Calculated Fukui indices for main atoms in **Co1**.

| Atom | Fukui(+) | Fukui(-) |
|------|----------|----------|
| Co   | 0.04479  | 0.168262 |
| N    | 0.058662 | 0.009301 |
| N    | 0.058686 | 0.009285 |
| S(5) | 0.03406  | 0.045207 |
| S(6) | 0.012557 | 0.012159 |
| S(5) | 0.034072 | 0.045235 |
| S(6) | 0.012555 | 0.012148 |

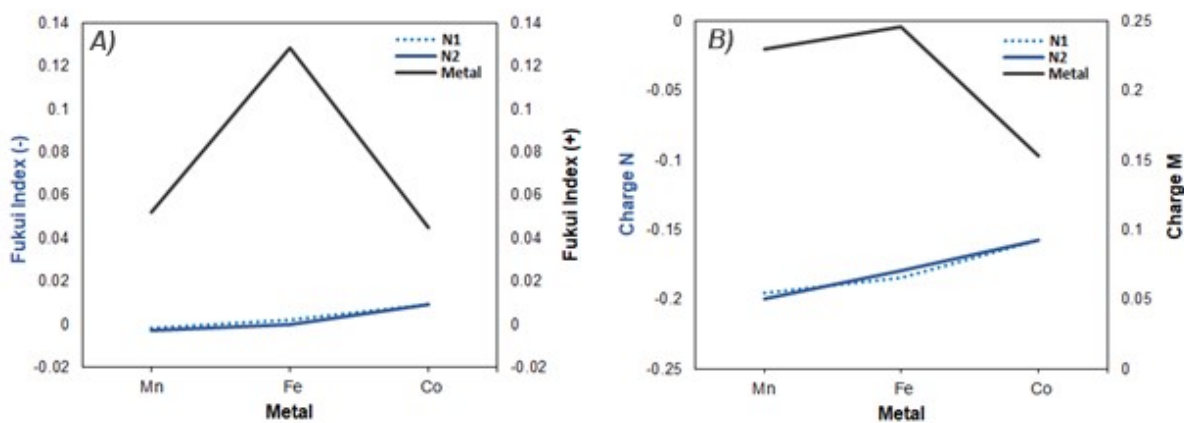

**Figure S11.** A) Chart of calculated Fukui (-/+) indices for both amido donors and metal of **Mn1**, **Fe1**, and **Co1**; B) Calculated Hirshfeld charges for both amido donors and metals

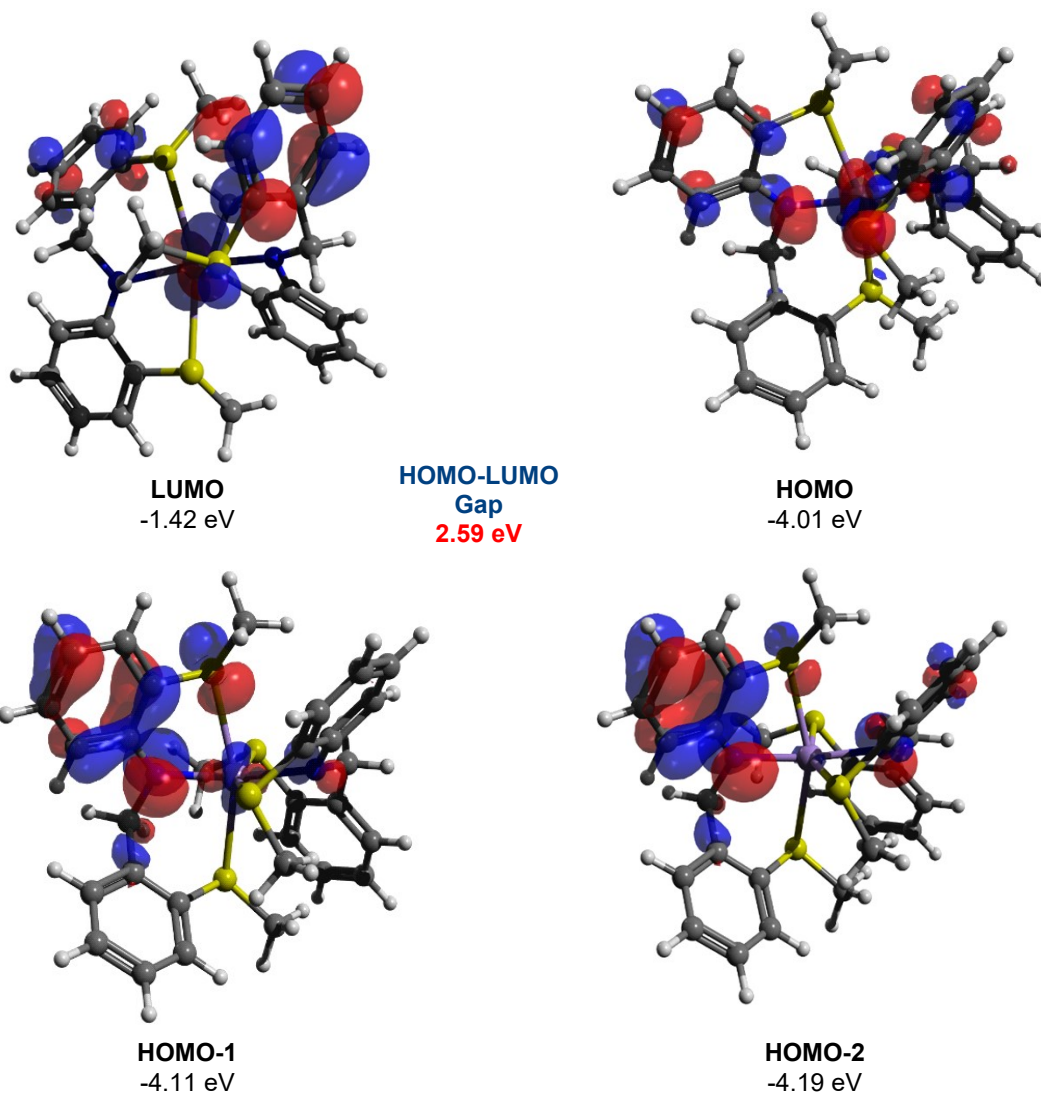

**Figure S12.** Frontier orbitals and energies of Mn1.

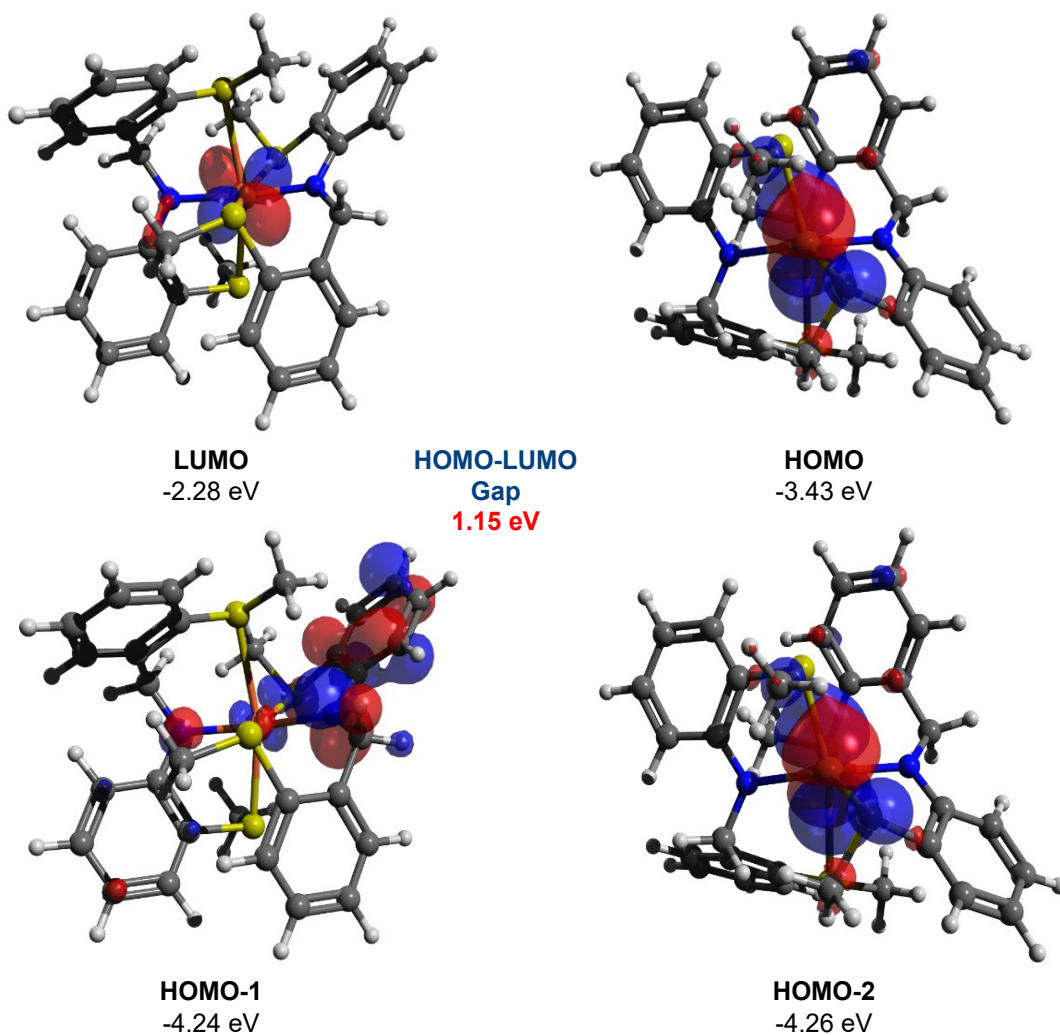

**Figure S13.** Frontier orbitals and energies of Fe1.

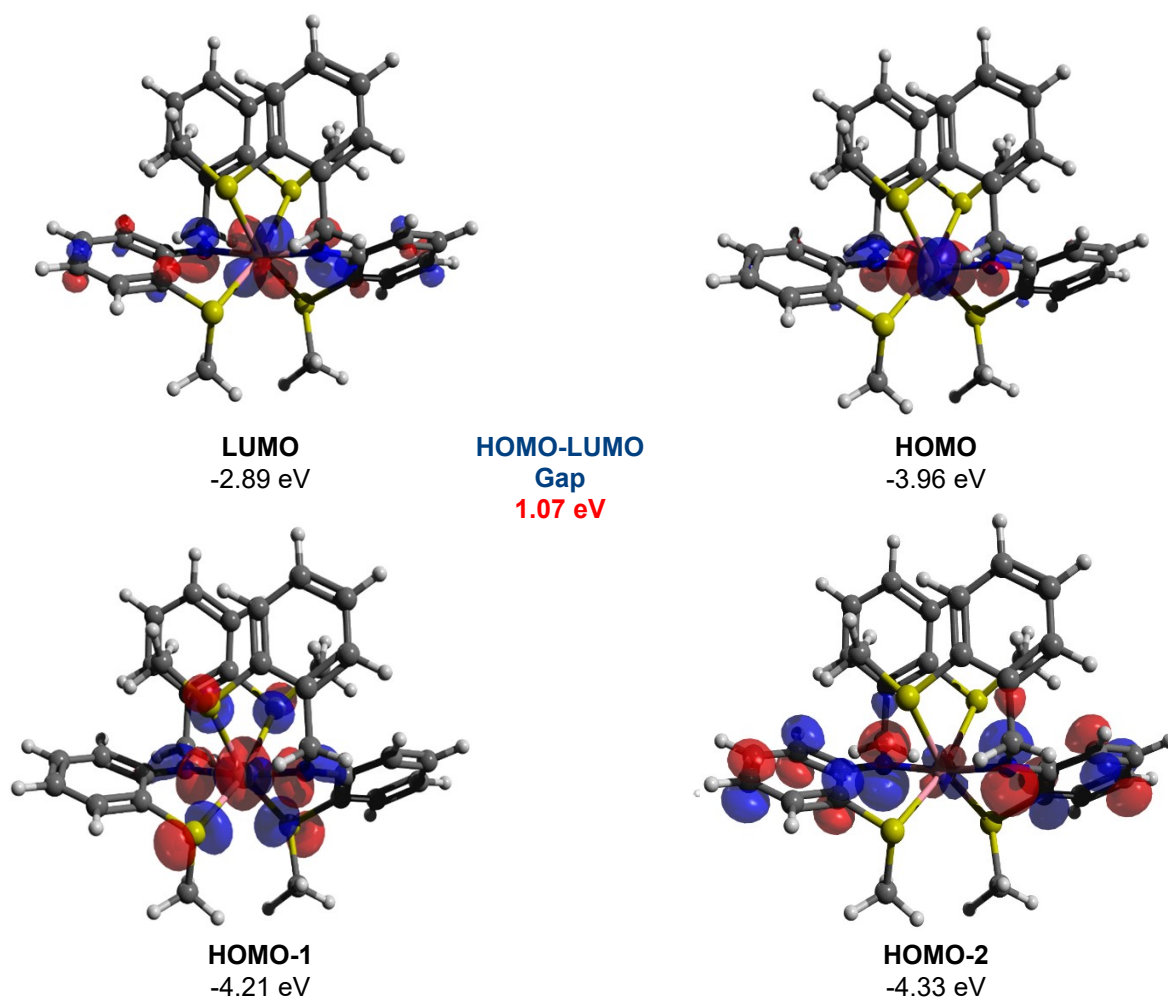

**Figure S14.** Frontier orbitals and energies of Co1.

**M3**                      **M3-TS**                      **M4**

**Bond Lengths (Angstroms)**

|             | $H_1-H_2$ | $N-H_1$ | $M-H_2$ | $H_1-H_2$ | $N-H_1$ | $M-H_2$ | $H_1-H_2$ | $N-H_1$ | $M-H_2$ |
|-------------|-----------|---------|---------|-----------|---------|---------|-----------|---------|---------|
| <b>[Mn]</b> | 0.760     | 2.621   | 3.883   | 1.063     | 1.293   | 1.902   | 1.837     | 1.026   | 1.723   |
| <b>[Fe]</b> | 0.760     | 2.589   | 3.758   | 1.109     | 1.232   | 1.909   | 1.704     | 1.032   | 1.715   |
| <b>[Co]</b> | 0.761     | 2.728   | 3.653   | 0.871     | 1.582   | 1.861   | 1.687     | 1.032   | 1.645   |

**Figure S15.** Key bond lengths in calculated complexes M3, M3-TS, and M4 for the Mn, Fe, and Co analogues.

**Table S16.** Energies (in Hartree) for all DFT compounds, intermediates, and transition states:  $E_{DZ}$  and thermal corrections were calculated at the M06-L/def2-SVP level of theory;  $E_{TZ}$  energy calculations were performed on the M06-L/def2-SVP at the M06-L/def2-TZVP level of theory with incorporation of solvation energy using the self-consistent reaction field (SCRF) for tetrahydrofuran.

| Compound             | $E_{TZ}$     | $E_{DZ}$     | Thermal Corrections<br>(T = 298.15 K, p = 1atm) |           |           |
|----------------------|--------------|--------------|-------------------------------------------------|-----------|-----------|
|                      |              |              | $E_{zpe}$                                       | H         | G         |
| <b>H<sub>2</sub></b> | -1.167912861 | -1.16791286  | 0.009919                                        | 0.013224  | -0.001571 |
| <b>Mn1 (S=1/2)</b>   | -4016.076284 | -4016.067541 | 0.549369                                        | 0.58664   | 0.482914  |
| <b>Mn1 (S=5/2)</b>   | -4016.128128 | -4014.110838 | 0.546559                                        | 0.58501   | 0.474914  |
| <b>Mn2</b>           | -4016.119331 | -4014.099311 | 0.547363                                        | 0.586029  | 0.474497  |
| <b>Mn3</b>           | -4017.289724 | -4015.263558 | 0.557822                                        | 0.599921  | 0.480409  |
| <b>Mn3-TS</b>        | -4017.258643 | -4015.238565 | 0.55871                                         | 0.598427  | 0.484071  |
| <b>Mn4</b>           | -4017.278808 | -4015.253371 | 0.563279                                        | 0.6043463 | 0.488097  |
| <b>Fe1 (S=1)</b>     | -4128.804241 | -4126.762886 | 0.547164                                        | 0.584844  | 0.480351  |
| <b>Fe1 (S=2)</b>     | -4128.828097 | -4126.791944 | 0.546588                                        | 0.584821  | 0.477596  |
| <b>Fe2</b>           | -4128.822619 | -4126.784552 | 0.546078                                        | 0.584724  | 0.474418  |
| <b>Fe3</b>           | -4129.99799  | -4127.953776 | 0.559685                                        | 0.600485  | 0.487135  |
| <b>Fe3-TS</b>        | -4129.961631 | -4127.920483 | 0.560068                                        | 0.598964  | 0.489185  |
| <b>Fe4</b>           | -4129.973566 | -4127.092979 | 0.564984                                        | 0.604338  | 0.492823  |
| <b>Co1 (S=1/2)</b>   | -4247.876133 | -4245.817702 | 0.547716                                        | 0.58536   | 0.480634  |
| <b>Co1 (S=3/2)</b>   | -4247.883557 | -4245.827935 | 0.547338                                        | 0.585275  | 0.478872  |
| <b>Co2</b>           | -4247.875558 | -4245.818415 | 0.546294                                        | 0.584742  | 0.475801  |
| <b>Co3</b>           | -4249.04683  | -4246.984529 | 0.559947                                        | 0.60047   | 0.488643  |
| <b>Co3-TS</b>        | -4248.999398 | -4246.939243 | 0.561543                                        | 0.600484  | 0.488457  |
| <b>Co4</b>           | -4249.028728 | -4246.965735 | 0.565274                                        | 0.604576  | 0.492775  |

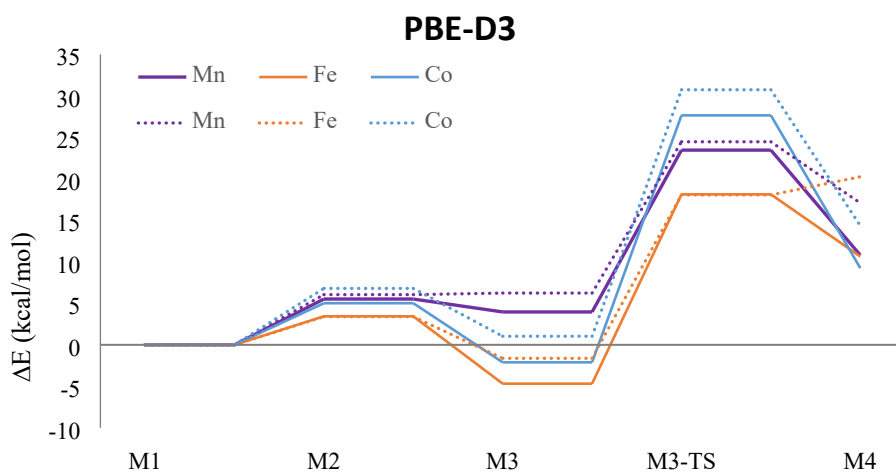

**Figure S16.** Reaction profiles comparing M06L functional (solid line) vs. PBE-D3 (dotted line).

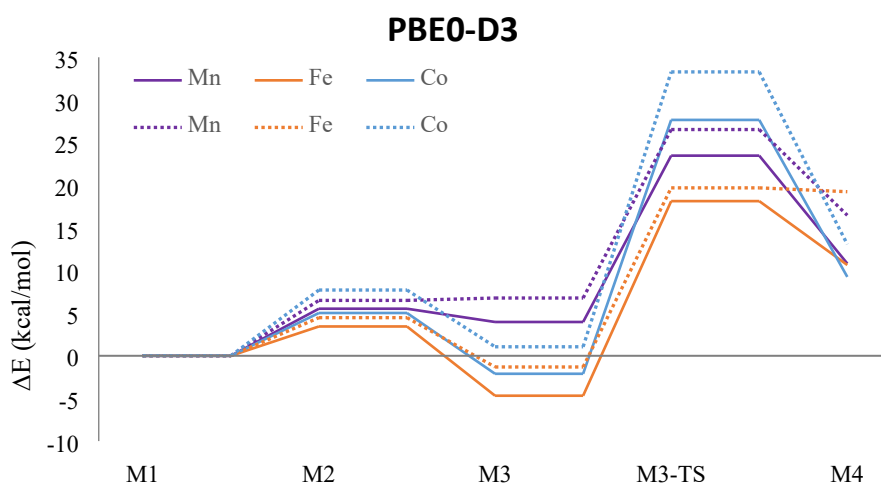

**Figure S17.** Reaction profiles comparing M06L functional (solid line) vs. PBE0-D3 (dotted line).

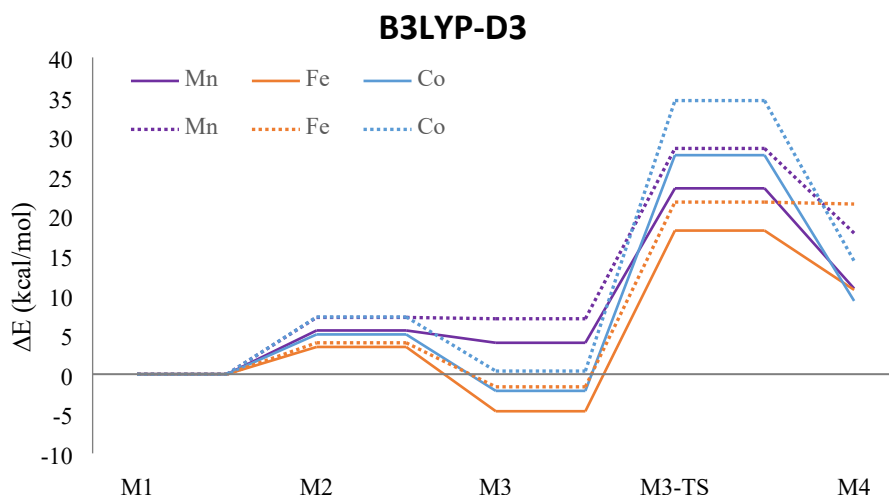

**Figure S18.** Reaction profiles comparing M06L functional (solid line) vs. B3LYP-D3 (dotted line).

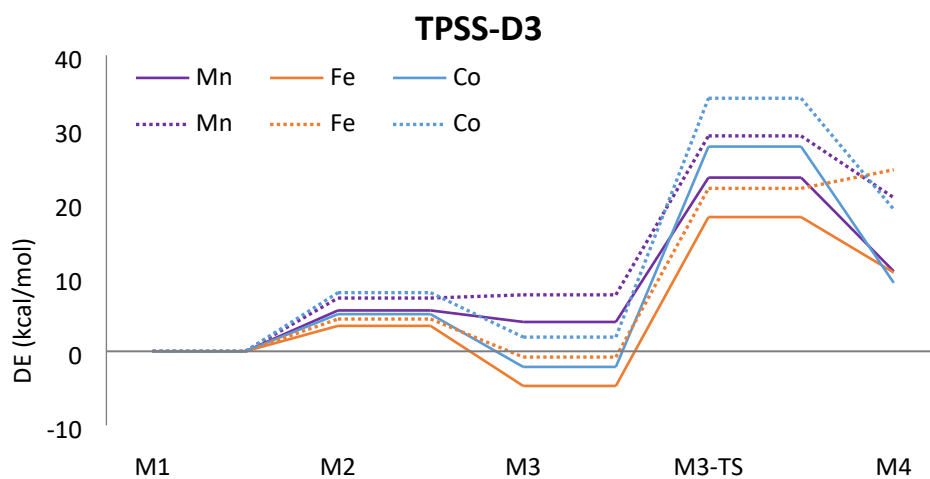

**Figure S19.** Reaction profiles comparing M06L functional (solid line) vs. TPSS-D3 (dotted line).

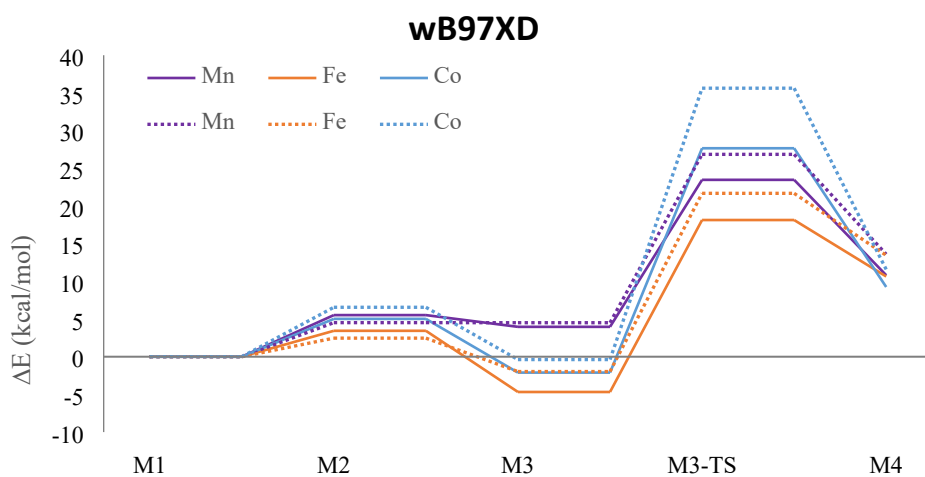

**Figure S20.** Reaction profiles comparing M06L functional (solid line) vs. xB97XD (dotted line).

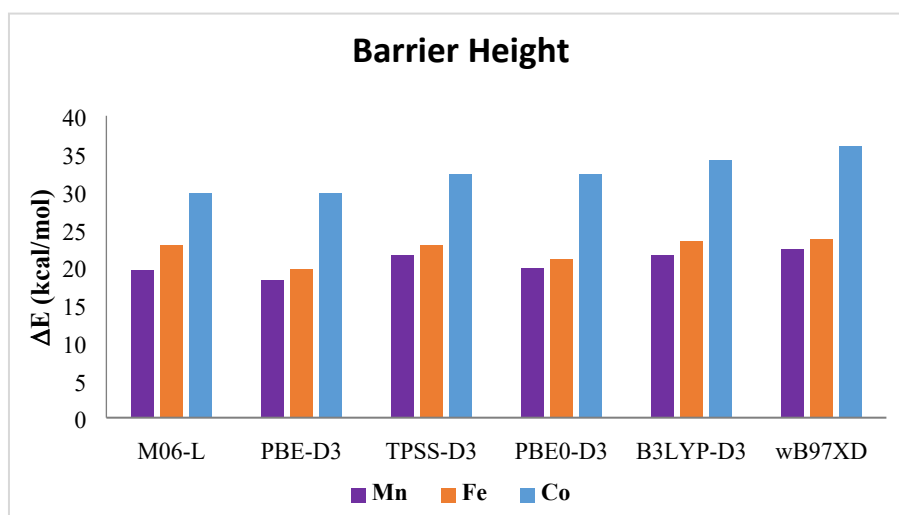

**Figure S21.** Overall reaction barriers benchmarking different functionals.



**Table S17.** Cartesian coordinates in Å for optimized structures.

**Dihydrogen**

H 0.00000000 0.00000000 0.00000000

H 0.00000000 0.00000000 -0.74392600

**Mn1 – (S = 1/2)**

C 0.00000000 0.00000000 0.00000000

N -1.34137600 -0.09425700 0.55620600

Mn -2.81800800 -1.36531200 -0.09824900

N -4.35624100 -2.46198500 -0.76637800

C -5.54971700 -1.84347500 -1.03566700

C -5.51955900 -0.47563500 -1.40367500

S -3.88894200 0.20628200 -1.52098300

C -4.15200600 1.91396800 -0.99443800

H -3.17427300 2.33695200 -0.77478200

H -4.61540200 2.48089900 -1.79868800

H -4.77047800 1.94869500 -0.10059700

C -6.66400500 0.23818300 -1.69872300

C -7.91003200 -0.37266800 -1.62851600

C -7.97372600 -1.71004400 -1.27067400

C -6.82867500 -2.43270400 -0.98051000

H -6.93114800 -3.46407800 -0.67496600

H -8.93570300 -2.20324100 -1.20034700

H -8.80726500 0.18960400 -1.84686400

H -6.58755200 1.27943800 -1.98630900

C -4.38857600 -3.90242100 -0.57408800

C -4.45760600 -4.32024900 0.86951700

C -3.35708300 -4.08421500 1.70740800

S -1.97198700 -3.27437500 0.94472200

C -0.88844300 -2.97102500 2.34814400

H -0.03586500 -2.43170100 1.94818500

H -1.37326500 -2.35371700 3.10161700

H -0.54933800 -3.90940600 2.78162200  
C -3.38721900 -4.48270300 3.03828800  
C -4.51816500 -5.10026000 3.55272600  
C -5.61667900 -5.32787300 2.74117100  
C -5.57465600 -4.94276200 1.40867900  
H -6.42392200 -5.13764000 0.76358600  
H -6.49952300 -5.81035800 3.13952100  
H -4.53342900 -5.40299600 4.59191500  
H -2.53889600 -4.30915700 3.68557000  
H -3.46593000 -4.31811000 -0.99545700  
H -5.20563300 -4.37300300 -1.12895300  
C -1.75110600 0.99944000 1.24707000  
C -3.02068500 0.98142200 1.89141700  
S -4.06408700 -0.41489000 1.59255100  
C -4.16629400 -1.17717100 3.23758600  
H -4.84260600 -2.02558500 3.16061100  
H -3.19442200 -1.51246500 3.59085200  
H -4.57883900 -0.44996800 3.93329800  
C -3.49387000 2.05188600 2.63304100  
C -2.73607100 3.20057600 2.79019100  
C -1.50351200 3.26362600 2.14858000  
C -1.02371600 2.21146900 1.39428700  
H -0.07779100 2.33601900 0.88758300  
H -0.90628200 4.16493100 2.22309500  
H -3.10551300 4.03077700 3.37558800  
H -4.47938000 1.98205500 3.08046700  
C 0.67154400 -1.31083400 -0.29779500  
C 0.15773100 -2.22590300 -1.22730300  
S -1.35425800 -1.74921500 -2.00015600  
C -1.84138700 -3.20700800 -2.92005300  
H -2.86733700 -3.02411900 -3.23086400  
H -1.21028300 -3.34558600 -3.79521100

H -1.81185300 -4.09219200 -2.28812100  
C 0.81764700 -3.42019400 -1.49149200  
C 2.00170700 -3.71933900 -0.83514000  
C 2.53334000 -2.82366800 0.07646000  
C 1.86816300 -1.63360400 0.33249600  
H 2.27694500 -0.92955200 1.04854400  
H 3.46047700 -3.04774200 0.58723700  
H 2.50673800 -4.65319800 -1.04541400  
H 0.41589200 -4.12143900 -2.20936100  
H 0.66307200 0.53167500 0.68981800  
H -0.00277800 0.60622500 -0.92616900

**Mn1 – (S = 5/2)**

C 0.00000000 0.00000000 0.00000000  
N -1.23171100 -0.46820900 0.60059100  
Mn -2.42587200 -2.01099600 -0.22446700  
N -3.78292400 -3.34477200 -1.12532500  
C -5.09593400 -2.94721800 -1.20231900  
C -5.40726600 -1.56738300 -1.42000800  
S -4.02659200 -0.47035900 -1.68114800  
C -4.63060400 1.09959300 -1.03168900  
H -3.75276000 1.73159800 -0.84548900  
H -5.28530100 1.60187000 -1.75578000  
H -5.16134000 0.94545900 -0.08344400  
C -6.71605200 -1.10276500 -1.50168800  
C -7.79712400 -1.97535400 -1.37266400  
C -7.53154700 -3.32898400 -1.18452500  
C -6.22512300 -3.79963400 -1.10013800  
H -6.07600600 -4.86459000 -0.93243200  
H -8.35638200 -4.04031600 -1.08870100  
H -8.82021000 -1.59991500 -1.42964800  
H -6.89918600 -0.04103300 -1.68364800

C -3.53306600 -4.77503900 -1.10077800  
C -3.44514600 -5.38809100 0.28226000  
C -2.28737600 -5.20477600 1.06913900  
S -0.95358800 -4.29700100 0.31451300  
C 0.30023800 -4.22633000 1.59479500  
H 1.13181300 -3.65147600 1.17015500  
H -0.06060900 -3.71760800 2.49761600  
H 0.65850300 -5.23352900 1.84412700  
C -2.19837900 -5.74121200 2.35677100  
C -3.26557500 -6.46767300 2.88418300  
C -4.40860300 -6.67605400 2.11940400  
C -4.48331400 -6.14464500 0.83235800  
H -5.37329800 -6.33575900 0.22817200  
H -5.24180700 -7.25737000 2.51937900  
H -3.19005600 -6.87888900 3.89328000  
H -1.29758800 -5.60469600 2.95769500  
H -2.57114900 -4.97106400 -1.61224600  
H -4.28003500 -5.33302500 -1.69232300  
C -1.99147700 0.50483500 1.18069800  
C -3.17325700 0.15850300 1.91975700  
S -3.63376600 -1.55509500 2.09508400  
C -2.30735500 -2.12694500 3.19672500  
H -2.38785500 -3.21961900 3.27515100  
H -1.33664300 -1.84123500 2.76699400  
H -2.42744400 -1.68016400 4.19151900  
C -3.98944200 1.12400200 2.50585900  
C -3.69109200 2.48198700 2.39945500  
C -2.53891800 2.84979200 1.70301100  
C -1.71239600 1.90044700 1.11285700  
H -0.83890300 2.24751600 0.55928200  
H -2.27673500 3.90759200 1.60764700  
H -4.33724900 3.23125200 2.85978400

H -4.87382300 0.79280800 3.05685600  
C 0.96877200 -1.10159700 -0.34366600  
C 0.74622200 -1.98770200 -1.41965900  
S -0.72564000 -1.72171900 -2.37295200  
C -0.91980800 -3.24731900 -3.30211300  
H -1.95990900 -3.24524700 -3.65175600  
H -0.24323500 -3.29332100 -4.16522400  
H -0.76841600 -4.11980300 -2.65213100  
C 1.66703300 -2.99923200 -1.71426000  
C 2.83198200 -3.12707400 -0.95937400  
C 3.08123500 -2.24842600 0.09233100  
C 2.14842300 -1.25486100 0.39109200  
H 2.33259300 -0.56762700 1.22200700  
H 3.99623200 -2.33686800 0.68183300  
H 3.54872900 -3.91362000 -1.20621600  
H 1.49040700 -3.68179700 -2.54744800  
H 0.52895700 0.69126400 0.68354600  
H -0.18616600 0.60643500 -0.91929800

**Mn2**

Mn 0.00000000 0.00000000 0.00000000  
N 1.28900700 -1.27904900 -0.92457600  
C 2.09261900 -2.17557300 -0.29090500  
C 2.19978800 -2.15405200 1.13761900  
S 1.39145800 -0.85856800 2.05597200  
C 2.58172500 0.50139400 1.80036700  
H 2.75149200 0.66331600 0.72459200  
H 2.16615800 1.41292400 2.25102000  
H 3.53308200 0.25427200 2.28762900  
C 2.94860100 -3.09444200 1.84477900  
C 3.65536700 -4.09118600 1.17841800  
C 3.60226900 -4.11466200 -0.21744700  
C 2.85770500 -3.18779000 -0.93251700

H 2.84079100 -3.26289000 -2.02019800  
H 4.15579200 -4.88093100 -0.76763200  
H 4.24087800 -4.82507400 1.73437200  
H 2.97954600 -3.02696900 2.93539300  
C 1.38794600 -1.13480600 -2.36493900  
H 0.42775500 -0.73825200 -2.74657600  
H 1.52020400 -2.09389300 -2.89546900  
C 2.51027600 -0.19041200 -2.72567900  
C 2.39213200 1.19691900 -2.48717200  
S 0.79950200 1.80573600 -1.96373700  
C 1.14960100 3.47236600 -1.39168500  
H 0.20613700 3.84768500 -0.97451700  
H 1.92145100 3.47754500 -0.60987200  
H 1.44551200 4.12685300 -2.22136700  
C 3.47693200 2.04920100 -2.70805500  
C 4.68857500 1.53573800 -3.17127400  
C 4.81635400 0.17533600 -3.42973400  
C 3.73047000 -0.67085800 -3.20681200  
H 3.82738200 -1.74116800 -3.40759700  
H 5.75922700 -0.23041700 -3.80220200  
H 5.52930700 2.21326000 -3.33668300  
H 3.38770300 3.12250100 -2.53275500  
N -1.98593400 0.18932100 -0.41718900  
C -2.50269600 1.44423500 -0.51651300  
C -1.93356300 2.52082000 0.24119900  
S -0.59677900 2.19189300 1.37585900  
C -1.46116700 1.29768200 2.70267800  
H -2.19807200 1.95785500 3.17611600  
H -1.95570800 0.40660100 2.29212700  
H -0.71294800 0.99133600 3.44480900  
C -2.39666300 3.83359100 0.12888800  
C -3.44701300 4.15019600 -0.72711300

C -4.04818900 3.11347000 -1.44728700  
C -3.60401600 1.80348600 -1.34375100  
H -4.11750000 1.02762200 -1.91499600  
H -4.89194600 3.33212800 -2.10772800  
H -3.80368400 5.17781200 -0.81350700  
H -1.92056600 4.61022900 0.73460000  
C -2.60052700 -0.85220800 -1.20274500  
H -1.91495000 -1.71995400 -1.23723700  
H -2.69908700 -0.56059000 -2.26916200  
C -3.93915300 -1.35636700 -0.70843500  
C -4.66869200 -2.31669300 -1.43972000  
S -4.04660800 -2.96323600 -2.98791600  
C -4.60770500 -1.66851100 -4.12289800  
H -4.16168100 -0.69060900 -3.89033400  
H -4.28449600 -1.96330100 -5.12920500  
H -5.70220300 -1.57884000 -4.11701700  
C -5.87856800 -2.81452900 -0.94351600  
C -6.39006600 -2.35708200 0.26908200  
C -5.68569400 -1.39511800 0.98828600  
C -4.47501500 -0.90514300 0.50186500  
H -3.92171400 -0.15327700 1.06939100  
H -6.07871200 -1.02243200 1.93751400  
H -7.33675200 -2.75043000 0.64689000  
H -6.41571300 -3.56881300 -1.52407100

**Mn3**

Mn 0.00000000 0.00000000 0.00000000  
N -2.03448400 -0.15074900 -0.18597500  
C -2.93211600 0.87004100 -0.26744600  
C -2.49123100 2.23088400 -0.25437400  
S -0.75457500 2.57676500 -0.09565000  
C -0.56677700 2.58743600 1.71830000  
H -1.08073000 3.45791200 2.14493000

H -0.98423000 1.66925200 2.15623800  
H 0.50560100 2.64933500 1.94661500  
C -3.37962000 3.29886000 -0.38394000  
C -4.74914000 3.08088100 -0.50623400  
C -5.21193200 1.76263200 -0.48812000  
C -4.34008900 0.68924200 -0.36873500  
H -4.75414600 -0.32061400 -0.33125600  
H -6.28479400 1.56352700 -0.56165800  
H -5.43949400 3.92013500 -0.60434900  
H -2.97817800 4.31578800 -0.38452400  
C -2.53703100 -1.49107400 -0.34234900  
H -1.71759300 -2.13866200 -0.70203100  
H -3.28564900 -1.55188100 -1.15935000  
C -3.07561200 -2.17033900 0.89454200  
C -3.32835000 -3.55921300 0.89372000  
S -3.13449600 -4.53348900 -0.59446600  
C -4.67385900 -4.11425100 -1.45509400  
H -4.74666300 -3.04135100 -1.68385600  
H -4.67248700 -4.67025900 -2.40106100  
H -5.55179000 -4.41903700 -0.87039700  
C -3.68484400 -4.21114300 2.07902700  
C -3.82156400 -3.49632200 3.26765700  
C -3.60871300 -2.11934100 3.26876400  
C -3.23597700 -1.46871200 2.09377900  
H -3.03492400 -0.39400500 2.10057600  
H -3.72243000 -1.54719700 4.19278600  
H -4.10000600 -4.01512400 4.18775900  
H -3.85563700 -5.29020100 2.05648600  
N 1.16149300 -1.34785500 1.01365500  
C 2.52265400 -1.38511700 1.05733800  
C 3.28528100 -0.23977400 0.67232500  
S 2.41368100 1.21277900 0.12146000



C 2.86328300 1.31086200 -1.63419700  
H 2.66582800 0.35785800 -2.14220700  
H 2.25020300 2.10604800 -2.07858600  
H 3.92219900 1.57515900 -1.74698400  
C 4.67707300 -0.21689100 0.75242200  
C 5.38734200 -1.34022200 1.16808500  
C 4.66904800 -2.48573800 1.51932500  
C 3.28208300 -2.51458500 1.46729800  
H 2.76497500 -3.43564000 1.74208900  
H 5.20331600 -3.38312900 1.84324700  
H 6.47719800 -1.32048500 1.21819400  
H 5.20778000 0.69838100 0.47517200  
C 0.44639300 -2.55607300 1.32212400  
H -0.61647800 -2.29216700 1.49007900  
H 0.75607800 -2.99695100 2.29140500  
C 0.48042300 -3.65642600 0.28036800  
C 0.57925100 -3.44949600 -1.10966500  
S 0.73481400 -1.81603800 -1.85346200  
C -0.38604000 -1.97270300 -3.26901000  
H -0.66665400 -0.95360900 -3.56328900  
H 0.09105100 -2.46549800 -4.12530000  
H -1.29004500 -2.52282400 -2.97417800  
C 0.56390800 -4.54285600 -1.98642800  
C 0.41109100 -5.84008400 -1.51198900  
C 0.29078400 -6.06074200 -0.14218400  
C 0.33525000 -4.97762500 0.72708200  
H 0.24778500 -5.14385500 1.80579700  
H 0.17060400 -7.07332200 0.24845900  
H 0.39493500 -6.67507000 -2.21552500  
H 0.67239500 -4.37749200 -3.05995900  
H -0.33541600 -0.34895600 3.85311100  
H 0.08139000 -0.44685000 3.22527000

### Mn3 – TS

C 0.00000000 0.00000000 0.00000000  
S 0.72402100 -0.04599100 1.67270600  
C -0.65846400 0.45711500 2.66945200  
C -1.04705600 1.83703000 2.66597500  
N -0.32535900 2.74059900 1.95939800  
Mn 1.56162300 2.45363100 1.17032400  
C -0.69637500 4.12984800 2.02086800  
H 0.21564400 4.74840300 1.89894900  
H -1.06549000 4.41481900 3.02914800  
C -1.68522900 4.59536300 0.97958000  
C -1.74210700 5.94572300 0.57048600  
S -0.63948400 7.20473600 1.18211600  
C -0.86950300 7.16658900 2.97809300  
H -1.91470800 6.94399800 3.22913300  
H -0.20214900 6.45059000 3.48026400  
H -0.63286800 8.17295700 3.34656100  
C -2.63009800 6.33694200 -0.44104100  
C -3.47004000 5.40910000 -1.04866300  
C -3.43637400 4.07867300 -0.63639900  
C -2.55156200 3.68425700 0.36404400  
H -2.51332800 2.63577600 0.67022200  
H -4.09771300 3.34161100 -1.09794900  
H -4.15533300 5.72987400 -1.83671900  
H -2.65514300 7.38633300 -0.74401900  
C -2.20317900 2.14184700 3.44030500  
C -2.85193700 1.17838600 4.19917700  
C -2.41734300 -0.15019000 4.22440800  
C -1.32323000 -0.49952400 3.43703000  
H -0.97184500 -1.53431200 3.40376600  
H -2.93344900 -0.90129100 4.82448100  
H -3.73023000 1.47101300 4.78188000

H -2.60074900 3.15907800 3.43109300  
H -0.72496000 -0.81446800 -0.12095100  
H -0.49032000 0.96975400 -0.16988200  
H 0.81735300 -0.12412800 -0.72277000  
H 1.70328200 2.99812800 -0.64651400  
N 3.22651600 4.09454600 0.71811700  
C 4.57825300 3.85348600 0.82269400  
C 5.06109100 2.51772600 0.78977100  
S 3.90027800 1.16307600 0.69034600  
C 4.26750900 0.26881200 2.22400600  
H 3.57205600 -0.57827100 2.27386500  
H 5.29536400 -0.11441500 2.21006900  
H 4.12422300 0.91968800 3.09699600  
C 6.42725300 2.24049000 0.84334900  
C 7.35847800 3.26477500 0.98788300  
C 6.90138800 4.58029800 1.06734100  
C 5.54507500 4.87221200 0.98539500  
H 5.21914200 5.91174800 1.05717200  
H 7.61490400 5.39883500 1.19194000  
H 8.42477000 3.03741900 1.03794100  
H 6.76219400 1.20157600 0.78054800  
C 2.72007400 5.42400400 0.90138000  
H 1.67590500 5.42379500 0.52288100  
H 3.22919000 6.17080000 0.25998100  
C 2.69337800 5.96509600 2.31461500  
C 2.57374900 5.19169500 3.48944400  
S 2.60473900 3.39866500 3.47336600  
C 1.47947000 2.97206400 4.81801300  
H 1.22776800 1.91259500 4.67523800  
H 1.93797600 3.09175600 5.80770200  
H 0.55115500 3.55529300 4.75332400  
C 2.47507700 5.82601000 4.73780500

C 2.47390300 7.21140800 4.84267000  
C 2.59129800 7.98840600 3.69198200  
C 2.70175400 7.35997000 2.45736900  
H 2.78134000 7.96353000 1.54791400  
H 2.60075800 9.07869800 3.75560000  
H 2.39529000 7.67887700 5.82677000  
H 2.40796800 5.22390200 5.64549500  
H 2.51493300 3.51205600 -0.19149400

**Mn4**

Mn 0.00000000 0.00000000 0.00000000  
N -1.69917300 0.33685300 1.13473000  
C -2.34090500 -0.56416900 1.90781300  
C -1.98807300 -1.95218000 1.81307700  
S -0.78327600 -2.45035100 0.59932200  
C -1.78063900 -2.39981600 -0.92790500  
H -2.54063500 -3.19032100 -0.90350200  
H -2.25957000 -1.41547700 -1.03127400  
H -1.10349100 -2.56083100 -1.77644800  
C -2.55740100 -2.92046400 2.64034900  
C -3.51835300 -2.57486400 3.58769300  
C -3.91889100 -1.23662600 3.66703700  
C -3.36369800 -0.26060500 2.85223000  
H -3.72821400 0.76640300 2.93034800  
H -4.69567400 -0.94702100 4.38068900  
H -3.96101000 -3.33487400 4.23326900  
H -2.23958000 -3.96051600 2.52746500  
C -1.97199900 1.74153400 1.27243100  
H -1.03245500 2.30305100 1.07903900  
H -2.23307700 2.01860900 2.31717000  
C -3.01295300 2.29495300 0.33044400  
C -2.96892100 3.63176200 -0.12080700  
S -1.67955500 4.77549300 0.33347200

C -1.76766300 4.82237200 2.14191100  
H -1.18144600 4.02417200 2.62052200  
H -1.35048200 5.78832900 2.45336800  
H -2.81136200 4.77124000 2.47810400  
C -3.91730300 4.09242800 -1.04486900  
C -4.91519900 3.24812800 -1.52156400  
C -4.97824600 1.93251100 -1.06609300  
C -4.03350200 1.46836400 -0.15461400  
H -4.06758800 0.42901900 0.18294900  
H -5.76130700 1.26136200 -1.42647200  
H -5.64585400 3.62230000 -2.24229600  
H -3.86208900 5.12921600 -1.38454900  
H 0.13325800 0.53776400 -1.63136900  
N 2.25775600 1.69889500 -0.37479300  
C 3.55233700 1.33906400 -0.04940900  
C 3.91673700 -0.03014800 -0.02643800  
S 2.68351400 -1.27117200 -0.39097100  
C 2.90221500 -2.39342600 1.01122500  
H 2.82710900 -1.84226100 1.95886200  
H 2.09175300 -3.13044600 0.95115400  
H 3.86092700 -2.92461200 0.96349400  
C 5.22083500 -0.39943900 0.30727700  
C 6.16301000 0.55621200 0.68177000  
C 5.79795900 1.90120900 0.70301100  
C 4.51389500 2.28955800 0.33540600  
H 4.24339300 3.34740700 0.34271200  
H 6.52384700 2.66278900 0.99670300  
H 7.17434300 0.24845100 0.95364500  
H 5.49853200 -1.45594900 0.29035500  
C 1.70207800 2.99924900 -0.12907100  
H 0.65621500 2.96110300 -0.49497800  
H 2.18190300 3.79789000 -0.72945600

C 1.68617400 3.44089300 1.31473000  
C 1.48011900 2.58686000 2.42105800  
S 1.36649600 0.81287700 2.22884000  
C 0.37415600 0.31637100 3.64863100  
H 0.06149800 -0.71719000 3.44744400  
H 0.94785700 0.33248000 4.58403600  
H -0.52989100 0.93331800 3.74024100  
C 1.41212000 3.13046500 3.71321100  
C 1.52910600 4.49992800 3.92529200  
C 1.72918400 5.35240500 2.84267400  
C 1.80800600 4.81374400 1.56320100  
H 1.96045900 5.47577800 0.70522800  
H 1.82911900 6.42943900 2.99239300  
H 1.47379700 4.89346900 4.94264500  
H 1.27428100 2.47354000 4.57276100  
H 1.77555400 1.18017200 -1.11769300

**Fe1 – (S = 1)**

Fe 0.00000000 0.00000000 0.00000000  
N 1.43436500 0.95477500 -0.94402500  
C 2.72356100 0.59216700 -0.66701000  
C 3.83724700 0.78475100 -1.52510200  
C 5.10309300 0.31188500 -1.18642600  
C 5.33329000 -0.35499600 0.01615500  
C 4.26619800 -0.51997000 0.90455500  
C 2.99965100 -0.06502300 0.56641800  
S 1.60181100 -0.10435400 1.67078600  
C 1.80063700 -1.68896300 2.51406400  
H 2.63916300 -1.64392900 3.22060700  
H 1.95729800 -2.50305100 1.79354300  
H 0.87740900 -1.85966400 3.08194600  
H 4.43089500 -1.00496600 1.87036900

H 6.32543100 -0.73152900 0.27018600  
H 5.92715500 0.46029600 -1.88964500  
H 3.69805900 1.27326400 -2.49081900  
C 1.25653800 1.80233200 -2.10888500  
C -0.05291000 2.53925400 -2.13955200  
C -0.08689900 3.93418900 -2.11924600  
C -1.29091900 4.63728200 -2.15973200  
C -2.49252100 3.93873300 -2.22550900  
C -2.49210900 2.54449200 -2.24554700  
C -1.28048400 1.85142800 -2.20266000  
S -1.16813900 0.08251600 -2.12335000  
C -2.87660900 -0.46054400 -2.28285000  
H -2.86564000 -1.54882700 -2.14428600  
H -3.52841900 -0.01188300 -1.52328000  
H -3.24038800 -0.22881300 -3.29247500  
H -3.44128400 2.00761200 -2.28333000  
H -3.44367300 4.47529800 -2.25617200  
H -1.28764400 5.72893200 -2.13660200  
H 0.86012100 4.47841700 -2.06442700  
H 2.06110700 2.55842200 -2.15596500  
H 1.35425900 1.21779800 -3.05424600  
N -1.42681100 -1.10116200 0.89188800  
C -1.29944700 -2.54593100 0.94361200  
C -1.50085900 -3.21752700 -0.40051400  
C -0.51229100 -3.12487300 -1.40780400  
C -0.76786600 -3.60450700 -2.69756900  
C -1.98449900 -4.21785700 -2.99240000  
C -2.93911600 -4.38577900 -1.99333900  
C -2.68685200 -3.88826200 -0.71459600  
H -3.43709000 -4.02636600 0.06776200  
H -3.88013200 -4.89720300 -2.20622300  
H -2.17065000 -4.58462900 -4.00445600

H -0.01155700 -3.51775100 -3.47903800  
S 1.05589900 -2.44153800 -0.94171700  
C 1.84721000 -2.10215600 -2.51610800  
H 2.78101000 -1.57920500 -2.27243600  
H 2.09109500 -3.02449700 -3.05915400  
H 1.21828700 -1.44506100 -3.13343500  
H -0.28932600 -2.78916000 1.31624500  
H -1.99385500 -2.99187600 1.67879200  
C -2.67191500 -0.55478400 0.92803200  
C -2.81360100 0.87309700 0.89287000  
C -4.06002900 1.49191000 0.81654900  
C -5.23616600 0.74253100 0.80798600  
C -5.12999800 -0.64426800 0.94353200  
C -3.89501800 -1.27626300 1.01209800  
H -3.87324300 -2.35998300 1.11181200  
H -6.03567900 -1.25611700 0.98682700  
H -6.20969000 1.23050000 0.73689800  
H -4.09469100 2.58447500 0.77466700  
S -1.35429800 1.88380300 1.03765100  
C -1.03361700 1.66082000 2.80879700  
H -0.06944800 2.13086100 3.03907800  
H -1.82569300 2.13419200 3.40293500  
H -0.97887200 0.58779600 3.04138300

**Fe1 – (S = 2)**

Fe 0.00000000 0.00000000 0.00000000  
N -1.45979800 -0.93240500 -1.06833900  
C -2.75424000 -0.57508000 -0.83314800  
C -3.80019100 -0.65004700 -1.79283600  
C -5.08505200 -0.19372800 -1.51759500  
C -5.40830600 0.35054900 -0.27449800  
C -4.42139800 0.38758000 0.71265200



C -3.13156300 -0.06148600 0.44894200  
S -1.90203900 -0.16894800 1.73804700  
C -2.10209900 1.38747300 2.62999400  
H -3.00900300 1.38054500 3.24823700  
H -2.12949700 2.23667300 1.93423900  
H -1.23255500 1.48527200 3.29292500  
H -4.66801600 0.75848400 1.71113600  
H -6.41469000 0.71497000 -0.06209700  
H -5.84826200 -0.25741900 -2.29814300  
H -3.58215500 -1.03707000 -2.78959400  
C -1.20571500 -1.62745000 -2.31434000  
C 0.14806000 -2.28368100 -2.34228500  
C 0.25825900 -3.67141700 -2.24026900  
C 1.49642900 -4.31199200 -2.22674400  
C 2.65827900 -3.55178100 -2.31613900  
C 2.58302200 -2.16392800 -2.42134500  
C 1.33693200 -1.52841900 -2.43515500  
S 1.15713700 0.23718900 -2.53051400  
C 2.85039300 0.83596500 -2.54466900  
H 2.77950500 1.93103400 -2.51755800  
H 3.40975800 0.49849600 -1.66190700  
H 3.36743000 0.53468400 -3.46543000  
H 3.50484500 -1.58341800 -2.48020500  
H 3.63869800 -4.03408600 -2.30176500  
H 1.55103300 -5.39910400 -2.14133400  
H -0.66064700 -4.25913400 -2.16023300  
H -1.96525700 -2.41479000 -2.47978600  
H -1.30110000 -0.94967600 -3.19573900  
N 1.46852600 1.10369400 0.90936500  
C 1.34949700 2.54251100 1.07596600  
C 1.47536100 3.31349100 -0.22150800  
C 0.43835000 3.26641100 -1.18016200

C 0.60076900 3.86895300 -2.43215100  
C 1.77549400 4.55866400 -2.73205600  
C 2.78113000 4.67013800 -1.77657700  
C 2.62064600 4.04900500 -0.53737700  
H 3.40948900 4.14392600 0.21323400  
H 3.69098800 5.23374200 -1.99304200  
H 1.88947700 5.02353700 -3.71403200  
H -0.19137400 3.81716100 -3.18014600  
S -1.07142200 2.47318700 -0.68962800  
C -1.99006200 2.34092800 -2.22378600  
H -2.92730700 1.83075400 -1.97138700  
H -2.22745000 3.33133100 -2.63252300  
H -1.44091200 1.73837100 -2.96092800  
H 0.36073200 2.75540500 1.52184200  
H 2.08014700 2.93542000 1.80543300  
C 2.72283600 0.56462900 0.89619000  
C 2.88119600 -0.85762700 0.81011700  
C 4.13184300 -1.46213800 0.70334200  
C 5.30026500 -0.70137900 0.70743200  
C 5.18153100 0.68035300 0.86777300  
C 3.93981400 1.29665700 0.96561900  
H 3.90964400 2.37876900 1.07903100  
H 6.08073700 1.30164400 0.90979300  
H 6.27759100 -1.17824100 0.61660000  
H 4.17677900 -2.55200200 0.62511900  
S 1.43162400 -1.89119900 0.89169000  
C 1.06105000 -1.73702500 2.66291200  
H 0.10438600 -2.24075800 2.84897500  
H 1.84995100 -2.21236300 3.25947800  
H 0.97228400 -0.67440900 2.92871500  
**Fe2**  
Fe 0.00000000 0.00000000 0.00000000

S 1.41290000 -1.93822200 0.85268800  
C 2.88746300 -0.93789800 0.81615900  
C 2.75668500 0.48635200 0.81178100  
N 1.51153800 1.05484800 0.82344400  
C 1.42360700 2.49038100 1.04465900  
H 2.21764400 2.84151200 1.72652500  
H 0.47818600 2.69449600 1.58185100  
C 1.44596100 3.32886500 -0.21600500  
C 0.31255900 3.37714900 -1.05669800  
S -1.13628300 2.53540700 -0.47572100  
C -2.23560400 2.52460200 -1.89258300  
H -2.53490400 3.54184900 -2.17608000  
H -3.12769900 1.96863600 -1.57802200  
H -1.78787400 2.00599300 -2.75229800  
C 0.34854000 4.07980000 -2.26491500  
H -0.52509500 4.10666700 -2.91850300  
C 1.50411500 4.76346000 -2.64123800  
H 1.52293600 5.30565300 -3.58931100  
C 2.61403200 4.77062400 -1.80161200  
H 3.51244200 5.32648300 -2.07750600  
C 2.57171800 4.06025200 -0.60191900  
H 3.44097100 4.07972100 0.06076200  
C 3.98461600 1.19916600 0.81353000  
C 5.21583200 0.55532800 0.78507400  
C 5.30985300 -0.83678200 0.76199500  
C 4.12649100 -1.57253100 0.78680500  
H 4.15434900 -2.66609800 0.78916200  
H 6.27878700 -1.33817400 0.73631800  
H 6.12588300 1.16186500 0.77355600  
H 3.97170200 2.28764300 0.81384800  
C 1.01698200 -1.82990100 2.62251400  
H 1.79671500 -2.32462100 3.21514400

H 0.05564200 -2.33303400 2.78396100  
H 0.93263900 -0.77473200 2.91701100  
S -1.96984100 -0.38271600 1.62882000  
C -3.18980800 -0.38993600 0.32576300  
C -2.72337700 -0.66690600 -0.99838500  
N -1.38955200 -0.72336000 -1.24797900  
C -0.95733700 -1.00528500 -2.59788800  
H -1.41243700 -0.30443500 -3.33269600  
H -1.27376100 -2.01329100 -2.93186100  
C 0.54061600 -0.85475100 -2.65764200  
C 1.42976500 -1.94752200 -2.54614200  
S 0.73426900 -3.57057200 -2.45210600  
C 2.14344900 -4.56588400 -1.95186500  
H 2.57918700 -4.18834600 -1.01538500  
H 2.91642400 -4.63014000 -2.72985600  
H 1.75151300 -5.57413900 -1.77324100  
C 2.80978500 -1.70332800 -2.50169300  
H 3.51484900 -2.53084700 -2.41107700  
C 3.30642700 -0.40093500 -2.53639200  
H 4.38481800 -0.23989800 -2.46419700  
C 2.44019900 0.68275700 -2.63812900  
C 1.06781300 0.44069000 -2.70653000  
H 0.37296600 1.27973300 -2.80929200  
H 2.82006100 1.70712800 -2.65616600  
C -3.73184300 -0.82850700 -1.98646100  
C -5.07934300 -0.66369600 -1.68940500  
C -5.50340000 -0.35125300 -0.39622000  
C -4.54433900 -0.24565300 0.61187100  
H -4.85809800 -0.05513800 1.64192000  
H -6.56220500 -0.22225400 -0.16599900  
H -5.81672100 -0.78535700 -2.48762500  
H -3.43953800 -1.07530300 -3.00867500

C -2.37144800 1.10260800 2.57692900  
H -3.31261300 0.97666600 3.12682100  
H -2.42920500 1.98599000 1.92812100  
H -1.56175300 1.23976600 3.30534500

**Fe3**

Fe 0.00000000 0.00000000 0.00000000  
S 1.36540300 -2.05059400 0.60410100  
C 2.89030700 -1.13302800 0.60221500  
C 2.83957200 0.29549100 0.64406200  
N 1.63096700 0.93360400 0.73454300  
C 1.63346900 2.37953700 0.90402400  
H 2.55925200 2.73958200 1.37862300  
H 0.83773000 2.65276800 1.62083400  
C 1.39928700 3.12821000 -0.38454900  
C 0.09044700 3.24611200 -0.90044100  
S -1.22287400 2.58818000 0.10081900  
C -2.63130500 2.60905100 -1.01385500  
H -2.97571400 3.63404700 -1.20486400  
H -3.43417000 2.04960200 -0.51696400  
H -2.39706500 2.09930900 -1.95736700  
C -0.13599100 3.87520600 -2.12873900  
H -1.14712400 3.97610700 -2.52603200  
C 0.93706400 4.38853000 -2.85741400  
H 0.74972500 4.87418000 -3.81775600  
C 2.23275000 4.29181100 -2.35751300  
H 3.07385700 4.70104500 -2.92112200  
C 2.45006900 3.66782600 -1.12873200  
H 3.46731700 3.59145200 -0.73483100  
H 0.21392500 0.98874000 2.90027900  
C 4.10752900 0.93692000 0.59940500  
C 5.29737400 0.22545800 0.51922400  
C 5.31218100 -1.16972900 0.47723900

C 4.09003600 -1.83574300 0.51890600  
H 4.05190800 -2.92845600 0.47955900  
H 6.24970500 -1.72442600 0.41150500  
H 6.23890500 0.78070400 0.48072000  
H 4.16430700 2.02512300 0.61152700  
C 1.05251300 -2.16781700 2.39056500  
H 1.82133200 -2.78953100 2.86633500  
H 0.06891200 -2.63515500 2.52636200  
H 1.05195500 -1.16889600 2.84586900  
S -2.06036700 -0.92966800 1.26791700  
C -3.12730900 -0.82458000 -0.16338900  
C -2.52512900 -0.60339500 -1.44018700  
N -1.18423700 -0.40966400 -1.54302900  
C -0.61580100 -0.25570300 -2.86536600  
H -0.83288400 0.74540100 -3.30020000  
H -1.05663100 -0.98518800 -3.57465400  
C 0.87405000 -0.46184100 -2.82906500  
C 1.41820200 -1.76716200 -2.74503800  
S 0.28029800 -3.11964500 -2.70550000  
C 1.36566200 -4.53533400 -2.50694400  
H 1.94560800 -4.46587100 -1.57520700  
H 2.04351100 -4.67090200 -3.36107500  
H 0.70981500 -5.41153300 -2.44305200  
C 2.80860200 -1.92977200 -2.70757700  
H 3.24912200 -2.92568200 -2.64120300  
C 3.65423000 -0.82128100 -2.73614500  
H 4.73515100 -0.97340900 -2.68679700  
C 3.12840900 0.46423800 -2.80059600  
C 1.74362900 0.63006800 -2.85106200  
H 1.31540500 1.63477100 -2.92102700  
H 3.78701700 1.33565000 -2.80995600  
C -3.42348900 -0.57104200 -2.54228100

C -4.79155800 -0.74383900 -2.38169700  
C -5.35060500 -0.96955100 -1.12190700  
C -4.49807300 -1.02604600 -0.02044500  
H -4.90785000 -1.23332900 0.97216700  
H -6.42477200 -1.11581400 -0.99805800  
H -5.43753400 -0.70013900 -3.26284400  
H -3.03075400 -0.38116400 -3.54238700  
C -2.83345400 0.24929600 2.40234400  
H -3.88299100 -0.01938900 2.57252800  
H -2.76558200 1.27945400 2.02764500  
H -2.29889600 0.17798000 3.35663600  
H -0.09703800 1.25915100 3.53934200

**Fe3 – TS**

C 0.00000000 0.00000000 0.00000000  
N 0.11951900 -1.43150000 0.23013000  
C -1.00149100 -2.19837000 0.48673000  
C -0.88362100 -3.61095000 0.59260000  
S 0.72484900 -4.37729000 0.53990000  
C 0.89911900 -4.78725000 -1.21721000  
H 0.16600800 -5.55184000 -1.50498000  
H 1.91342900 -5.18728100 -1.34427000  
H 0.79031900 -3.89175000 -1.84185000  
C -1.99894100 -4.41530000 0.82573000  
C -3.26898100 -3.86188900 0.96200000  
C -3.40189100 -2.47636900 0.87717000  
C -2.29895100 -1.66357000 0.64583000  
H -2.44488000 -0.58450900 0.59675000  
H -4.38512100 -2.01339900 0.99641000  
H -4.13558100 -4.50011900 1.14438000  
H -1.85301200 -5.49568000 0.91498000  
H -0.97156000 0.26795000 -0.44686000  
H 0.75228000 0.25186000 -0.77193000

C 0.24927000 0.83156000 1.22901000  
C 1.56835000 1.03823000 1.69142000  
S 2.88409000 0.38228900 0.69281000  
C 4.34320000 0.68644900 1.69328000  
H 4.55570000 1.76080900 1.77289000  
H 5.17943000 0.19604900 1.17875000  
H 4.25087000 0.23253900 2.68860000  
C 1.79626000 1.75777900 2.86940000  
H 2.81080000 1.92172900 3.23533000  
C 0.72343000 2.28025000 3.59020000  
H 0.91722100 2.83822000 4.50917000  
C -0.58032000 2.10181000 3.13630000  
H -1.42174000 2.52021000 3.69253000  
C -0.80256000 1.38378000 1.96225000  
H -1.82548000 1.24512000 1.60021000  
H 0.94395900 -1.83267000 -0.59239000  
Fe 2.20199900 -2.32139100 0.83002000  
N 3.31310900 -2.37386100 2.49910000  
C 4.67214900 -2.45801100 2.48687000  
C 5.35872900 -2.91328100 1.31867000  
S 4.38149900 -3.44721100 -0.07203000  
C 4.83580900 -2.24674100 -1.34848000  
H 5.89988900 -2.32669200 -1.60663000  
H 4.59400000 -1.22417100 -1.02840000  
H 4.22860900 -2.48132100 -2.23159000  
C 6.74846900 -2.99678200 1.26586000  
C 7.53375900 -2.60302200 2.34783000  
C 6.89006900 -2.15650200 3.50381000  
C 5.50515900 -2.08943100 3.57983000  
H 5.04958900 -1.71103100 4.49664000  
H 7.48236900 -1.84870200 4.37024000  
H 8.62224900 -2.66015200 2.29417000



H 7.21982900 -3.38182200 0.35682000  
C 2.67426900 -2.03334100 3.75121000  
H 2.72859000 -0.94350100 3.97469000  
H 3.19053900 -2.53469100 4.59591000  
C 1.23536900 -2.46509000 3.77960000  
C 0.90270900 -3.84293000 3.81582000  
S 2.23533900 -5.00663100 3.77645000  
C 1.39078800 -6.56718000 4.05467000  
H 0.72734800 -6.82868000 3.21759000  
H 0.82178800 -6.57260000 4.99485000  
H 2.17765800 -7.32805100 4.11939000  
C -0.44325100 -4.22063000 3.89769000  
H -0.72140100 -5.27556000 3.91745000  
C -1.45125100 -3.25807000 3.94297000  
H -2.49468100 -3.57860900 3.99535000  
C -1.13396100 -1.90519000 3.89672000  
C 0.20545900 -1.52396000 3.81974000  
H 0.47067000 -0.46271000 3.81135000  
H -1.92027000 -1.14675000 3.92035000  
H 1.93920900 -2.03461100 -1.03889000

**Fe4**

C 0.00000000 0.00000000 0.00000000  
N 0.32412100 -1.39554500 0.23357000  
C -0.58471500 -2.32574200 0.67848500  
C -0.21966400 -3.68630200 0.87290900  
S 1.46565500 -4.25705200 0.71915800  
C 1.57304500 -4.64748900 -1.04808800  
H 0.85688900 -5.43914000 -1.30257200  
H 2.59543300 -5.00375500 -1.22862100  
H 1.40531900 -3.75212400 -1.66033500  
C -1.16712100 -4.62565200 1.28597000  
C -2.48828900 -4.26759700 1.53138400

C -2.85099300 -2.93066100 1.37560200  
C -1.92444100 -1.98243500 0.96328000  
H -2.24787800 -0.94841800 0.84694900  
H -3.87828700 -2.61453900 1.57461800  
H -3.21525900 -5.01525000 1.85358400  
H -0.83885200 -5.65828900 1.43332100  
H 1.13545600 -1.73564500 -0.30629900  
H -1.02557000 0.10889300 -0.39158400  
H 0.66244400 0.34207300 -0.81167800  
C 0.17752400 0.89349200 1.20545400  
C 1.46737300 1.31014400 1.61414100  
S 2.83701000 0.78514900 0.63027200  
C 4.26098700 1.45136900 1.49409800  
H 4.26488200 2.54966200 1.49600300  
H 5.13986700 1.09592200 0.94187700  
H 4.33548500 1.06754100 2.52067400  
C 1.61269600 2.11220000 2.75335200  
H 2.60212600 2.43842800 3.07774000  
C 0.49592000 2.50124200 3.49032600  
H 0.63044600 3.12199500 4.37924000  
C -0.77933300 2.11091600 3.09129200  
H -1.65835300 2.42250300 3.65897200  
C -0.92245600 1.31953900 1.95207600  
H -1.92450500 1.02458800 1.62670200  
Fe 3.06381100 -2.29625300 0.85273400  
N 4.05508000 -1.77866800 2.50256100  
C 5.41195700 -1.67571700 2.54664600  
C 6.21703400 -2.29036800 1.53908100  
S 5.41163800 -3.21385800 0.24144300  
C 5.64993800 -2.09841700 -1.16962100  
H 6.71708600 -2.00675500 -1.41050000  
H 5.21449300 -1.11269800 -0.95823900

H 5.11327300 -2.53244400 -2.02215800  
 C 7.60876700 -2.22446800 1.56694800  
 C 8.27515300 -1.52414400 2.57048400  
 C 7.51278600 -0.90710800 3.56447500  
 C 6.12623600 -0.97949800 3.56075100  
 H 5.57162700 -0.46527700 4.34816700  
 H 8.01098800 -0.35192700 4.36439700  
 H 9.36514500 -1.47191100 2.58131900  
 H 8.17492700 -2.73889300 0.78502900  
 C 3.30381100 -1.36676500 3.66455700  
 H 3.11330800 -0.26993200 3.69447800  
 H 3.87726300 -1.59090000 4.58834600  
 C 1.98387100 -2.08011400 3.78055500  
 C 1.93258800 -3.49157600 3.91192200  
 S 3.45543200 -4.39216600 3.79591300  
 C 2.94799700 -6.05666100 4.24980300  
 H 2.25935000 -6.49101000 3.51095100  
 H 2.49624500 -6.10113600 5.25058600  
 H 3.86626600 -6.65613000 4.25522400  
 C 0.69856400 -4.11158000 4.14652600  
 H 0.63727300 -5.19555800 4.25383100  
 C -0.47177800 -3.35960900 4.24607800  
 H -1.42066700 -3.87007600 4.42805100  
 C -0.43458700 -1.97955000 4.08584600  
 C 0.79241500 -1.35711500 3.86016900  
 H 0.84050800 -0.26919300 3.76674200  
 H -1.34867100 -1.38358100 4.13836200  
 H 2.74909400 -1.97077800 -0.80177000  
**Co1 – (S = 1/2)**  
 Co 0.00000000 0.00000000 0.00000000  
 N -1.70465300 0.03651300 -0.95418700

C -1.77920300 0.65173200 -2.26429500  
C -1.72024000 2.16199400 -2.21386000  
C -2.84492900 2.95854600 -2.44066500  
C -2.79877400 4.34808800 -2.31674700  
C -1.60241000 4.96748900 -1.96445400  
C -0.45466700 4.20317500 -1.75224400  
C -0.50998100 2.81134200 -1.87806400  
S 0.89881700 1.76365400 -1.68299200  
C 2.22489000 2.88327900 -1.22351200  
H 2.45148800 3.56251600 -2.05581900  
H 1.99232600 3.45315500 -0.31501400  
H 3.09907200 2.24761900 -1.03349700  
H 0.48111000 4.69960500 -1.48855700  
H -1.55133400 6.05424000 -1.86340500  
H -3.69550900 4.94361900 -2.50037800  
H -3.78152800 2.47632400 -2.73382200  
H -2.68571700 0.33997000 -2.81169400  
H -0.93228000 0.27235900 -2.86516900  
C -2.83915800 -0.10804700 -0.23002100  
C -4.14719300 0.29361300 -0.63070100  
C -5.24430000 0.14984400 0.20715600  
C -5.12800800 -0.39951000 1.48869200  
C -3.87219800 -0.84329700 1.89876400  
C -2.76413000 -0.71361600 1.06525200  
S -1.19889900 -1.41821900 1.55263300  
C -1.43303900 -3.08550400 0.87353200  
H -1.57607600 -3.03541400 -0.21401800  
H -0.54935900 -3.68886800 1.11254000  
H -2.31447600 -3.54287200 1.34026100  
H -3.73897600 -1.30721500 2.88033900  
H -5.99437800 -0.48916100 2.14564300  
H -6.22173500 0.48857400 -0.14839700

H -4.29656400 0.73633400 -1.61512100  
N 1.70472600 0.03649500 0.95401600  
C 1.77946800 0.65162900 2.26414600  
C 1.72048000 2.16186800 2.21366800  
C 0.51017500 2.81110200 1.87789600  
C 0.45473200 4.20292100 1.75199200  
C 1.60244600 4.96731800 1.96407400  
C 2.79889900 4.34801000 2.31622200  
C 2.84517400 2.95847800 2.44022900  
H 3.78186700 2.47632300 2.73319000  
H 3.69563600 4.94361100 2.49962700  
H 1.55129100 6.05406100 1.86297900  
H -0.48107700 4.69925600 1.48823900  
S -0.89849600 1.76322100 1.68277500  
C -2.22467500 2.88271000 1.22329300  
H -1.99275500 3.45193700 0.31422300  
H -3.09908200 2.24702600 1.03443000  
H -2.45064600 3.56250900 2.05530800  
H 2.68605300 0.33987300 2.81142000  
H 0.93261700 0.27227600 2.86512700  
C 2.83914300 -0.10831800 0.22980000  
C 2.76387700 -0.71373900 -1.06552500  
C 3.87182600 -0.84362600 -1.89914500  
C 5.12778000 -0.40018500 -1.48913000  
C 5.24429500 0.14910000 -0.20758600  
C 4.14729300 0.29308600 0.63037500  
H 4.29685500 0.73570600 1.61481900  
H 6.22183900 0.48759200 0.14789600  
H 5.99406700 -0.48995700 -2.14617300  
H 3.73841700 -1.30742100 -2.88075500  
S 1.19835300 -1.41776800 -1.55280100  
C 1.43250100 -3.08557200 -0.87497100

H 2.31378100 -3.54264700 -1.34228400  
H 1.57586800 -3.03632900 0.21258000  
H 0.54869700 -3.68867400 -1.11416900

**Co1 – (S = 3/2)**

Co 0.00000000 0.00000000 0.00000000  
N -1.72456800 0.13602200 -0.98132300  
C -1.77789400 0.74150500 -2.30067100  
C -1.68436100 2.25289200 -2.25194500  
C -2.79755000 3.06933700 -2.46536400  
C -2.73682700 4.45572500 -2.31570700  
C -1.53449500 5.05190500 -1.94725700  
C -0.39380200 4.27003200 -1.76466100  
C -0.45959100 2.88173700 -1.92744100  
S 0.95971400 1.83335600 -1.80589000  
C 2.27139900 2.94082500 -1.28187100  
H 2.47372300 3.69656600 -2.05217100  
H 2.04409600 3.42272200 -0.32138600  
H 3.16213700 2.31173700 -1.16153300  
H 0.54810900 4.75206300 -1.49741300  
H -1.47082300 6.13473300 -1.81528600  
H -3.62726400 5.06423100 -2.48672400  
H -3.74086900 2.60619300 -2.76645900  
H -2.68372900 0.44987200 -2.86121300  
H -0.93005700 0.34236500 -2.88687700  
C -2.88086800 0.01818200 -0.27626200  
C -4.15897200 0.48557200 -0.69288800  
C -5.28492900 0.37908600 0.11232500  
C -5.22230700 -0.20167800 1.38162700  
C -4.00036600 -0.71996400 1.80609000  
C -2.86526100 -0.63290800 1.00186700  
S -1.36825700 -1.43721800 1.54658600

C -1.58439500 -3.02926100 0.70323600  
H -1.62519900 -2.88127800 -0.38461500  
H -0.73284700 -3.67037200 0.96191200  
H -2.50945600 -3.50907900 1.04669500  
H -3.91612500 -1.21718000 2.77622800  
H -6.10679700 -0.26814300 2.01713200  
H -6.23669800 0.76887400 -0.25974100  
H -4.26361800 0.95442800 -1.66991200  
N 1.72450500 0.13549100 0.98184600  
C 1.77781000 0.74075800 2.30127100  
C 1.68458600 2.25218400 2.25283700  
C 0.45999700 2.88137300 1.92834500  
C 0.39454100 4.26971900 1.76581800  
C 1.53538900 5.05130000 1.94864000  
C 2.73755200 4.45478000 2.31710400  
C 2.79793500 3.06835900 2.46652500  
H 3.74110900 2.60495900 2.76766700  
H 3.62811200 5.06305000 2.48832100  
H 1.47195900 6.13416900 1.81688800  
H -0.54724000 4.75201100 1.49858600  
S -0.95951000 1.83331000 1.80642900  
C -2.27096400 2.94112700 1.28258100  
H -2.04355400 3.42319600 0.32221000  
H -3.16181700 2.31224000 1.16206800  
H -2.47322300 3.69672300 2.05304300  
H 2.68354100 0.44885200 2.86185700  
H 0.92983800 0.34167600 2.88732700  
C 2.88077700 0.01779300 0.27675400  
C 2.86513000 -0.63301200 -1.00151000  
C 4.00018400 -0.71993300 -1.80581700  
C 5.22214900 -0.20176300 -1.38129100  
C 5.28484800 0.37865700 -0.11182700

C 4.15893500 0.48497900 0.69346300  
H 4.26364200 0.95354800 1.67061600  
H 6.23665100 0.76829300 0.26031400  
H 6.10661100 -0.26810500 -2.01684800  
H 3.91588800 -1.21696000 -2.77604600  
S 1.36808000 -1.43724200 -1.54618600  
C 1.58383600 -3.02901200 -0.70217700  
H 2.50887000 -3.50910700 -1.04530300  
H 1.62442300 -2.88049200 0.38560900  
H 0.73220000 -3.67006300 -0.96071300

**Co2**

Co 0.00000000 0.00000000 0.00000000  
S 1.57918900 -1.65569000 0.95386700  
C 2.92478300 -0.49986600 0.78399500  
C 2.62722100 0.89767200 0.69028800  
N 1.32635400 1.30757400 0.71337700  
C 1.05961400 2.72613100 0.86290300  
H 1.78319300 3.20592400 1.54725600  
H 0.07483700 2.83427800 1.35596200  
C 1.03271100 3.49999200 -0.44016800  
C -0.02924900 3.32691100 -1.35497400  
S -1.38280000 2.31732200 -0.81710800  
C -2.38099500 2.11811500 -2.29469200  
H -2.77578700 3.08052000 -2.64523800  
H -3.22241900 1.47625500 -2.00678100  
H -1.82130200 1.62238900 -3.10076900  
C -0.00659200 3.96063300 -2.60178000  
H -0.81965500 3.81441600 -3.31457400  
C 1.05330800 4.79989800 -2.94185900  
H 1.06118800 5.28628200 -3.91989600  
C 2.07837000 5.03111300 -2.02974600  
H 2.89643500 5.71081300 -2.27683100



C 2.05498600 4.38380000 -0.79459600  
H 2.85541900 4.57718900 -0.07495000  
C 3.76384500 1.74768800 0.62083000  
C 5.06001300 1.24921700 0.60097200  
C 5.31568600 -0.12242600 0.65994300  
C 4.22833200 -0.98765100 0.76279800  
H 4.38521700 -2.06757300 0.83621800  
H 6.33632600 -0.50843600 0.64179900  
H 5.89338100 1.95414800 0.53056600  
H 3.62123000 2.82470300 0.55548000  
C 1.18261400 -1.41261500 2.71038500  
H 2.00538900 -1.77750700 3.33768200  
H 0.27005400 -1.98093200 2.92943400  
H 1.00564700 -0.34494400 2.89827400  
S -1.94003100 -0.32698000 1.50784000  
C -3.08048900 -0.58230900 0.15979700  
C -2.50635500 -0.98873000 -1.08599000  
N -1.15389000 -0.96469500 -1.23571100  
C -0.60448100 -1.39549600 -2.50154300  
H -1.09670000 -0.87557100 -3.35238000  
H -0.79029100 -2.47175500 -2.68338400  
C 0.86791900 -1.07866300 -2.54927400  
C 1.87805800 -2.05889600 -2.44068800  
S 1.37788900 -3.74790000 -2.26310600  
C 2.90619900 -4.55596400 -1.77594400  
H 3.32955800 -4.09285600 -0.87342300  
H 3.65656300 -4.56820800 -2.57829500  
H 2.63751200 -5.59304600 -1.54278300  
C 3.22353100 -1.66266900 -2.47123100  
H 4.01889900 -2.40492200 -2.38942200  
C 3.57072000 -0.31786600 -2.57937200  
H 4.62639100 -0.03626000 -2.57234800

C 2.58324300 0.65886500 -2.66802700  
C 1.24645300 0.26449900 -2.65928700  
H 0.45836600 1.01885100 -2.74844000  
H 2.84396700 1.71790400 -2.73485600  
C -3.42575200 -1.36295700 -2.10089300  
C -4.79968000 -1.26403700 -1.91273000  
C -5.33181900 -0.80939300 -0.70507500  
C -4.45725200 -0.49643600 0.33772200  
H -4.85860300 -0.19299400 1.30822200  
H -6.41054500 -0.72959200 -0.56051400  
H -5.46956700 -1.54990300 -2.72810300  
H -3.04538500 -1.72259700 -3.05840300  
C -2.59760500 1.13365300 2.33905900  
H -3.54334600 0.90913400 2.84823100  
H -2.73387400 1.96143000 1.63094100  
H -1.85809800 1.42106800 3.09690000

**Co3**

Co 0.00000000 0.00000000 0.00000000  
S 2.02561800 -1.24238600 0.63225200  
C 3.05336200 0.19790900 0.44690300  
C 2.42870000 1.48120200 0.33056900  
N 1.07019800 1.58721300 0.43301900  
C 0.45251500 2.90312500 0.42118500  
H 1.17978100 3.70928600 0.59589400  
H -0.24951600 2.97715300 1.27161100  
C -0.29256400 3.17549300 -0.86173500  
C -1.64125100 2.78436500 -1.01572600  
S -2.44430000 2.08345300 0.40210900  
C -4.12935300 1.83168500 -0.16717200  
H -4.60651600 2.78629700 -0.42855300  
H -4.67198900 1.38892700 0.67696600  
H -4.18243600 1.13403700 -1.01412000

C -2.29171300 2.96644400 -2.24209600  
H -3.32895200 2.65478300 -2.37349400  
C -1.61691400 3.55137000 -3.31328800  
H -2.13894300 3.69055200 -4.26300200  
C -0.29360700 3.96005400 -3.17089600  
H 0.23497000 4.42648500 -4.00509800  
C 0.35313000 3.76489700 -1.95060900  
H 1.39717800 4.07164800 -1.83323600  
H -0.49060800 1.12722900 2.62249800  
C 3.33001300 2.56159400 0.12016200  
C 4.70430900 2.37661100 0.04817800  
C 5.28210100 1.11184400 0.17516800  
C 4.43300000 0.02608800 0.37167200  
H 4.83685600 -0.98702100 0.45601100  
H 6.36287600 0.97378200 0.11458800  
H 5.34123800 3.24979900 -0.12021700  
H 2.94472200 3.57414300 -0.00396000  
C 1.72449900 -1.22044400 2.42840200  
H 2.65082700 -1.46122700 2.96496300  
H 0.96993600 -1.98707800 2.65039600  
H 1.36066300 -0.23386600 2.74270400  
S -1.65878300 -1.56548200 0.94318000  
C -2.80429400 -1.31165300 -0.40383200  
C -2.24692000 -0.78657200 -1.60933500  
N -0.93027600 -0.44780200 -1.63139200  
C -0.31050900 -0.17650700 -2.91120900  
H -0.55686200 0.84171200 -3.27690100  
H -0.69689000 -0.87907600 -3.67887700  
C 1.18384400 -0.32919000 -2.83985600  
C 1.76908800 -1.59625400 -2.60088500  
S 0.68172800 -2.96487500 -2.31945600  
C 1.81671500 -4.35727000 -2.27394500

H 2.49568800 -4.30169700 -1.41120200  
H 2.40045100 -4.45254000 -3.20002300  
H 1.19170800 -5.25120400 -2.16232600  
C 3.16521700 -1.71778000 -2.58977800  
H 3.63444100 -2.68436300 -2.40139500  
C 3.97740300 -0.60672100 -2.81181300  
H 5.06363000 -0.72390800 -2.78743600  
C 3.41196700 0.64424000 -3.03295400  
C 2.02370800 0.76710400 -3.04539000  
H 1.56072100 1.74210700 -3.22254400  
H 4.04480600 1.52170500 -3.18166300  
C -3.13269200 -0.67429200 -2.71195600  
C -4.46733200 -1.05307800 -2.61325300  
C -4.98706200 -1.55596600 -1.41895600  
C -4.13813300 -1.69254200 -0.31771900  
H -4.52382900 -2.11688200 0.61306500  
H -6.03348100 -1.85717600 -1.34527500  
H -5.11716500 -0.94689700 -3.48597900  
H -2.76019300 -0.25959500 -3.65060000  
C -2.60989900 -1.01387800 2.37403000  
H -3.47385000 -1.66823100 2.54404400  
H -2.93491400 0.02771700 2.25244300  
H -1.94633100 -1.08530800 3.24440200  
H -0.68087700 1.35411900 3.32381500

**Co3 – TS**

C 0.00000000 0.00000000 0.00000000  
N 0.73177300 -1.08764600 0.61916800  
C 0.04922700 -2.15732000 1.07575400  
C 0.72270400 -3.39644500 1.34797200  
S 2.45942300 -3.53560600 1.01345000  
Co 3.31943200 -1.29366400 1.43549200  
N 4.30522800 -0.20500900 2.68397800

C 5.65805100 -0.03199500 2.62272500  
C 6.43483200 -0.71327100 1.63921800  
S 5.60340300 -1.76597800 0.46780700  
C 5.59228600 -0.67770800 -0.98731900  
H 6.61721500 -0.51511700 -1.34473500  
H 5.11895200 0.28325200 -0.74353500  
H 5.00882800 -1.17418100 -1.77331400  
C 7.82014600 -0.58307500 1.57374600  
C 8.50100400 0.25444900 2.45413700  
C 7.76350400 0.95157100 3.41291500  
C 6.38476600 0.81378000 3.50372900  
H 5.84813500 1.38461200 4.26287500  
H 8.27488500 1.61954000 4.11126300  
H 9.58591700 0.35591200 2.39547800  
H 8.36723300 -1.15050500 0.81562200  
C 3.63326100 0.30599000 3.86334200  
H 3.52746100 1.40865400 3.83218600  
H 4.24126700 0.09050300 4.76761000  
C 2.27557900 -0.30555900 4.05127100  
C 2.12273100 -1.70269700 4.20741400  
S 3.59847900 -2.70008900 4.16011600  
C 2.96661900 -4.34766000 4.49792100  
H 2.25323300 -4.67492000 3.72845300  
H 2.50292200 -4.41348300 5.49162800  
H 3.83721600 -5.01354800 4.47013200  
C 0.84897300 -2.24334900 4.41828600  
H 0.71115600 -3.31867700 4.53547600  
C -0.27082600 -1.41641700 4.45702100  
H -1.25685000 -1.86604500 4.59467300  
C -0.13366800 -0.03949300 4.30821500  
C 1.13676900 0.49740000 4.11771300  
H 1.25789000 1.57882900 4.01018700

H -1.00649900 0.61705700 4.33099900  
C 2.47590100 -3.58619400 -0.80048800  
H 2.04028400 -4.53240600 -1.14350900  
H 3.52170800 -3.52705600 -1.12927100  
H 1.90413000 -2.74088100 -1.20418000  
C 0.06302600 -4.51394000 1.86231500  
C -1.30238800 -4.48070600 2.12904700  
C -1.99829300 -3.30247700 1.83354100  
C -1.35734000 -2.18795300 1.31804900  
H -1.93968700 -1.28454900 1.13840600  
H -3.07558700 -3.25063400 2.01869300  
H -1.81461400 -5.35578700 2.53257400  
H 0.63860500 -5.42829800 2.03860800  
H -0.88184100 -0.37620800 -0.55453700  
H 0.66645600 0.43326300 -0.77493200  
C -0.45887700 1.14940600 0.87063700  
C 0.45939400 2.09390900 1.38401900  
S 2.16717200 1.83636400 1.00606900  
C 2.98934500 3.22515600 1.79208000  
H 2.73814100 4.18426900 1.31798400  
H 4.06450900 3.03838000 1.67135400  
H 2.77421700 3.28200300 2.86907300  
C 0.00467500 3.16930500 2.15751400  
H 0.70807300 3.90562100 2.55075300  
C -1.35410900 3.32143500 2.42801600  
H -1.68945300 4.16725700 3.03317700  
C -2.27345700 2.41224500 1.91286700  
H -3.34203600 2.53494900 2.10234500  
C -1.81532500 1.34804500 1.13763100  
H -2.53865400 0.64969400 0.70506900  
H 2.16894600 -0.92301900 -0.02026000  
H 2.97013400 -0.73044800 -0.30325600

**Co4**

Co 0.00000000 0.00000000 0.00000000  
N -1.61992000 -0.85205400 -0.72616900  
C -2.67696400 -1.02930000 0.22743600  
C -4.00269300 -0.40704400 -0.14274200  
C -4.29388100 -0.02606300 -1.45430100  
C -5.50531100 0.57783400 -1.79270500  
C -6.45403400 0.81253800 -0.80219400  
C -6.19410000 0.43877200 0.51559700  
C -4.97893500 -0.17022200 0.85401200  
S -4.56551400 -0.64132200 2.51177800  
C -6.02669000 -0.16384400 3.44059100  
H -6.21524800 0.91771100 3.39540200  
H -6.92235800 -0.70785100 3.11073800  
H -5.82220000 -0.43528200 4.48286100  
H -6.95012400 0.63093000 1.27836600  
H -7.40783000 1.28591100 -1.04756100  
H -5.70536100 0.85902900 -2.82903200  
H -3.54635900 -0.21363400 -2.22813900  
H -2.84596800 -2.09461900 0.50369600  
H -2.33657500 -0.57235400 1.17818300  
C -1.51275600 -1.65742200 -1.80935400  
C -2.26300300 -2.84236600 -2.03879800  
C -2.00033500 -3.66486300 -3.12697500  
C -1.00811000 -3.34632400 -4.05995200  
C -0.31056200 -2.14752400 -3.90778500  
C -0.56108600 -1.30855700 -2.82337900  
S 0.26306700 0.27251600 -2.71507500  
C -1.11117100 1.38768600 -3.09996200  
H -1.86480300 1.33787600 -2.30000400  
H -0.70311600 2.40541900 -3.16222300  
H -1.56432900 1.12011300 -4.06348300

H 0.43227900 -1.84052200 -4.64885100  
H -0.80539200 -4.00128500 -4.90908300  
H -2.58688400 -4.57972600 -3.25209200  
H -3.04963900 -3.11949800 -1.33276700  
N 1.50876800 1.69047700 0.04076700  
C 2.85318400 1.18970700 -0.27094400  
C 3.30446100 0.17389500 0.74251000  
C 2.90144400 -1.17789000 0.69775100  
C 3.29826200 -2.05337200 1.71202000  
C 4.08524900 -1.60300700 2.76902400  
C 4.49805300 -0.27483000 2.82018200  
C 4.10586700 0.59656100 1.80683100  
H 4.41965700 1.64461700 1.83994200  
H 5.11918700 0.08298300 3.64334100  
H 4.37984500 -2.30278200 3.55431400  
H 2.98949700 -3.09910800 1.68401900  
S 1.90492900 -1.71192700 -0.67199400  
C 1.06266700 -3.16228000 -0.02179900  
H 0.56645500 -2.90469200 0.92530100  
H 0.30203300 -3.41715100 -0.77202800  
H 1.73878800 -4.01813300 0.09927700  
H 3.58325600 2.01910400 -0.29007400  
H 2.82209700 0.77290800 -1.29264600  
C 1.01813600 2.80325300 -0.69038400  
C -0.28592200 3.27341800 -0.39665700  
C -0.80157900 4.36115600 -1.10354400  
C -0.06713500 4.95364300 -2.13130100  
C 1.19152900 4.45879600 -2.45714200  
C 1.73202200 3.39284200 -1.73611700  
H 2.71867300 3.01283000 -2.00300700  
H 1.76592000 4.90185400 -3.27295500  
H -0.49226400 5.79432100 -2.68322600



H -1.79916800 4.73718300 -0.87057800  
S -1.18742600 2.37793200 0.83553200  
C -2.88435300 2.91218400 0.56484500  
H -3.03608600 3.95901400 0.85905800  
H -3.19313000 2.75415800 -0.47781900  
H -3.49799500 2.27200300 1.21142900  
H 1.40729000 1.82557600 1.05032400  
H 0.20222700 -0.31290700 1.60689200

## V. References

- (1) D. F. Evans, *J. Chem. Soc.* 1959, 2003.
- (2) M.R. Elsby, M. Son, C. Oh, J. Martin, M. H. Baik, and R. T. Baker, *A.C.S. Catal.* 2021, **11**, 9043-9051.
- (3) U. K. Das, S. L. Daifuku, T. E. Iannuzzi, S. I. Gorelsky, I Korobkov, B. Gabidullin, M. L. Neidig, and R. T. Baker, *Inorg. Chem.* 2017, **56**, 22, 13766-13776.
- (4) M. M. Olmstead, P. P. Power, and S. C. Shoner. *Inorg. Chem.* 1991, **30**, 2547-2551.
- (5) APEX 2, Bruker AXS Inc., Madison, Wisconsin, USA, 2012
- (6) G. M. Sheldrick, SADABS, Program for empirical absorption correction of area detector data, University of Göttingen, Germany, 1996.
- (7) G. M. Sheldrick, *Acta Cryst.* 2015, **71**, 3-8.
- (8) M. J. Frisch, G. W. Trucks, H. B. Schlegel, G. E. Scuseria, M. A. Robb, J. R. Cheeseman, G. Scalmani, V. Barone, B. Mennucci, G. A. Petersson, H. Nakatsuji, M. Caricato, X. Li, H. P. Hratchian, A. F. Izmaylov, J. Bloino, G. Zheng, J. L. Sonnenberg, M. Hada, M. Ehara, K. Toyota, R. Fukuda, J. Hasegawa, M. Ishida, T. Nakajima, Y. Honda, O. Kitao, H. Nakai, T. Vreven, J. A. Montgomery, Jr., J. E. Peralta, F. Ogliaro, M. Bearpark, J. J. Heyd, E. Brothers, K. N. Kudin, V. N. Staroverov, R. Kobayashi, J. Normand, K. Raghavachari, A. Rendell, J. C. Burant, S. S. Iyengar, J. Tomasi, M. Cossi, N. Rega, J. M. Millam, M. Klene, J. E. Knox, J. B. Cross, V. Bakken, C. Adamo, J. Jaramillo, R. Gomperts, R. E. Stratmann, O. Yazyev, A. J. Austin, R. Cammi, C. Pomelli, J. W. Ochterski, R. L. Martin, K. Morokuma, V. G. Zakrzewski, G. A. Voth, P. Salvador, J. J. Dannenberg, S. Dapprich, A. D. Daniels, Ö. Farkas, J. B. Foresman, J. V. Ortiz, J. Cioslowski, and D. J. Fox, *Gaussian 09* (Gaussian, Inc., Wallingford CT, 2009)
- (9) J. R. Schmidt, and W. F. Polik, *WebMO Enterprise*, version .0; WebMO LLC: Holland, MI, USA, 2020.
- (10) B. Marten, K. Kim, C. Cortis, R. A. Friesner, R. B. Murphy, M. N. Ringnalda, D. Sitkoff, and B. Honig, *J. Phys. Chem.* 1996, **100**, 11775.
- (11) M. Friedrichs, R. H. Zhou, S. R. Edinger, and R. A. Friesner, *J. Phys. Chem. B.* 1999, **103**, 3057.
- (12) S. R. Edinger, C. Cortis, P. S. Shenkin, and R. A. Friesner, *J. Phys. Chem. B.* 1997, **101**, 1190.
- (13) F. De Proft, C. Van Alsenoy, A. Peeters, W. Langenaeker, and P. Geerlings, *J. Comput. Chem.* 2002, **23**, 12, 1198-1209.
